# Supplementary material for: A lanthanide-based metal–organic framework with a dynamic porous property
Source: Royal Society of Chemistry journal article supplement (doi:10.1039/b806615a), 2008-01-01
Supplement: b806615a.pdf [file b806615a.pdf]

## Supporting information S2, Space group and unit cell obtained from XPRD patterns of complex 1 at different temperature

### The space group and cell parameter obtained from XPRD patterns of 1 at 25 °C via JADE5

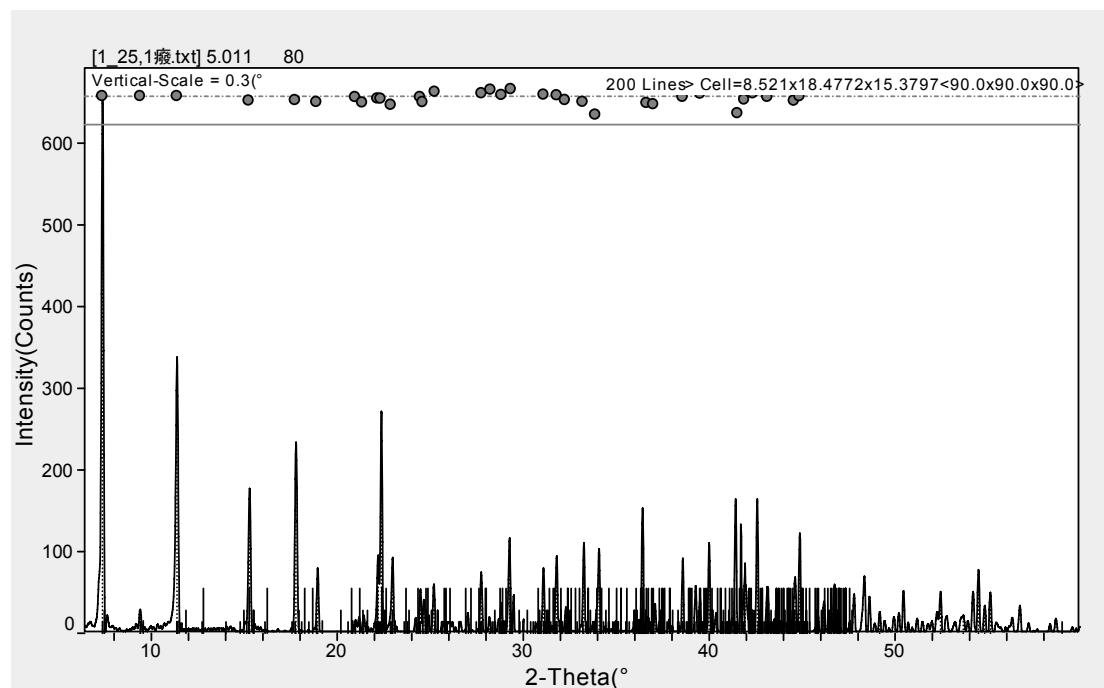

Pattern Indexing - Seek Miller Indices & Unit Cell [4 Hits Sorted on Figure-Of-Merit]

[1\_25,1癢.txt] 5.011 809

1> fm=40, fn=12, p?=0, r?=7, C=O, Space Group=Pnma (62), a=8.528, b=15.551, c=18.778, Angle=90.00, Volume=2490.4

| @ 2T(o) | h | k | l | 2T(c)  | Delta  | d(c)    | d(o)    | Del-d  | I%    |
|---------|---|---|---|--------|--------|---------|---------|--------|-------|
| 7.375   | 0 | 1 | 1 | 7.375  | 0.000  | 11.9769 | 11.9769 | 0.0000 | 100.0 |
| 9.412   | 0 | 0 | 2 | 9.412  | 0.000  | 9.3889  | 9.3889  | 0.0000 | 3.8   |
| -----   | 0 | 2 | 0 | 11.371 | ---    | 7.7754  | ---     | ---    |       |
| 11.386  | 1 | 0 | 1 | 11.386 | 0.000  | 7.7651  | 7.7651  | 0.0000 | 51.1  |
| -----   | 1 | 1 | 1 | 12.732 | ---    | 6.9472  | ---     | ---    |       |
| -----   | 1 | 0 | 2 | 14.017 | ---    | 6.3129  | ---     | ---    |       |
| -----   | 0 | 2 | 2 | 14.781 | ---    | 5.9885  | ---     | ---    |       |
| -----   | 1 | 1 | 2 | 15.134 | ---    | 5.8493  | ---     | ---    |       |
| 15.295  | 0 | 1 | 3 | 15.246 | -0.048 | 5.8066  | 5.7883  | 0.0182 | 26.6  |
| -----   | 1 | 2 | 1 | 16.118 | ---    | 5.4944  | ---     | ---    |       |
| -----   | 1 | 0 | 3 | 17.561 | ---    | 5.0461  | ---     | ---    |       |
| 17.779  | 0 | 3 | 1 | 17.736 | -0.043 | 4.9967  | 4.9847  | 0.0120 | 35.3  |
| -----   | 1 | 2 | 2 | 18.085 | ---    | 4.9009  | ---     | ---    |       |
| -----   | 1 | 1 | 3 | 18.470 | ---    | 4.7997  | ---     | ---    |       |
| 18.950  | 0 | 0 | 4 | 18.888 | -0.062 | 4.6945  | 4.6792  | 0.0153 | 10.8  |
| -----   | 1 | 3 | 1 | 20.584 | ---    | 4.3112  | ---     | ---    |       |

Electronic Supplementary Information for Dalton Transactions  
This journal is © The Royal Society of Chemistry 2008

|        |   |   |   |        |        |        |        |         |      |
|--------|---|---|---|--------|--------|--------|--------|---------|------|
| -----  | 2 | 0 | 0 | 20.814 | ---    | 4.2642 | ---    | ---     |      |
| 20.982 | 1 | 2 | 3 | 20.970 | -0.012 | 4.2328 | 4.2305 | 0.0023  | 0.5  |
| 21.418 | 2 | 0 | 1 | 21.350 | -0.068 | 4.1584 | 4.1454 | 0.0130  | 3.0  |
| -----  | 1 | 0 | 4 | 21.590 | ---    | 4.1126 | ---    | ---     |      |
| -----  | 2 | 1 | 0 | 21.591 | ---    | 4.1124 | ---    | ---     |      |
| -----  | 0 | 2 | 4 | 22.100 | ---    | 4.0188 | ---    | ---     |      |
| -----  | 2 | 1 | 1 | 22.109 | ---    | 4.0172 | ---    | ---     |      |
| 22.198 | 1 | 3 | 2 | 22.171 | -0.026 | 4.0061 | 4.0014 | 0.0047  | 14.0 |
| -----  | 0 | 3 | 3 | 22.249 | ---    | 3.9923 | ---    | ---     |      |
| 22.370 | 1 | 1 | 4 | 22.342 | -0.028 | 3.9759 | 3.9710 | 0.0049  | 40.4 |
| -----  | 0 | 4 | 0 | 22.856 | ---    | 3.8877 | ---    | ---     |      |
| 22.979 | 2 | 0 | 2 | 22.886 | -0.093 | 3.8826 | 3.8671 | 0.0154  | 13.1 |
| -----  | 2 | 1 | 2 | 23.599 | ---    | 3.7669 | ---    | ---     |      |
| -----  | 2 | 2 | 0 | 23.778 | ---    | 3.7389 | ---    | ---     |      |
| -----  | 2 | 2 | 1 | 24.252 | ---    | 3.6669 | ---    | ---     |      |
| -----  | 0 | 1 | 5 | 24.362 | ---    | 3.6506 | ---    | ---     |      |
| 24.476 | 1 | 2 | 4 | 24.466 | -0.010 | 3.6354 | 3.6339 | 0.0015  | 7.3  |
| 24.664 | 1 | 3 | 3 | 24.600 | -0.063 | 3.6158 | 3.6066 | 0.0092  | 4.3  |
| -----  | 0 | 4 | 2 | 24.766 | ---    | 3.5919 | ---    | ---     |      |
| 25.205 | 2 | 0 | 3 | 25.250 | 0.046  | 3.5241 | 3.5304 | -0.0063 | 8.5  |
| -----  | 1 | 4 | 1 | 25.604 | ---    | 3.4763 | ---    | ---     |      |
| -----  | 2 | 2 | 2 | 25.624 | ---    | 3.4736 | ---    | ---     |      |
| -----  | 1 | 0 | 5 | 25.901 | ---    | 3.4371 | ---    | ---     |      |
| -----  | 2 | 1 | 3 | 25.902 | ---    | 3.4370 | ---    | ---     |      |
| -----  | 1 | 1 | 5 | 26.537 | ---    | 3.3561 | ---    | ---     |      |
| -----  | 1 | 4 | 2 | 26.911 | ---    | 3.3103 | ---    | ---     |      |
| -----  | 2 | 3 | 0 | 27.054 | ---    | 3.2931 | ---    | ---     |      |
| -----  | 2 | 3 | 1 | 27.475 | ---    | 3.2436 | ---    | ---     |      |
| -----  | 1 | 3 | 4 | 27.665 | ---    | 3.2218 | ---    | ---     |      |
| 27.740 | 2 | 2 | 3 | 27.770 | 0.030  | 3.2098 | 3.2132 | -0.0034 | 10.6 |
| 28.182 | 2 | 0 | 4 | 28.250 | 0.067  | 3.1564 | 3.1638 | -0.0074 | 2.3  |
| -----  | 1 | 2 | 5 | 28.367 | ---    | 3.1436 | ---    | ---     |      |
| -----  | 0 | 0 | 6 | 28.497 | ---    | 3.1296 | ---    | ---     |      |
| -----  | 2 | 3 | 2 | 28.704 | ---    | 3.1075 | ---    | ---     |      |
| 28.826 | 2 | 1 | 4 | 28.838 | 0.012  | 3.0934 | 3.0946 | -0.0012 | 5.0  |
| -----  | 1 | 4 | 3 | 28.969 | ---    | 3.0797 | ---    | ---     |      |
| -----  | 0 | 5 | 1 | 29.078 | ---    | 3.0683 | ---    | ---     |      |
| 29.269 | 0 | 3 | 5 | 29.343 | 0.074  | 3.0413 | 3.0488 | -0.0075 | 17.2 |
| -----  | 0 | 4 | 4 | 29.814 | ---    | 2.9942 | ---    | ---     |      |
| -----  | 1 | 0 | 6 | 30.398 | ---    | 2.9381 | ---    | ---     |      |
| -----  | 2 | 2 | 4 | 30.541 | ---    | 2.9246 | ---    | ---     |      |
| -----  | 2 | 3 | 3 | 30.651 | ---    | 2.9144 | ---    | ---     |      |
| -----  | 0 | 2 | 6 | 30.771 | ---    | 2.9033 | ---    | ---     |      |
| -----  | 1 | 5 | 1 | 30.947 | ---    | 2.8872 | ---    | ---     |      |

Electronic Supplementary Information for Dalton Transactions  
This journal is © The Royal Society of Chemistry 2008

|        |   |   |   |        |        |        |        |         |      |  |
|--------|---|---|---|--------|--------|--------|--------|---------|------|--|
| ----   | 1 | 1 | 6 | 30.949 | ---    | 2.8870 | ---    | ---     |      |  |
| 31.089 | 2 | 4 | 0 | 31.105 | 0.015  | 2.8729 | 2.8743 | -0.0014 | 11.4 |  |
| ----   | 1 | 3 | 5 | 31.198 | ---    | 2.8646 | ---    | ---     |      |  |
| ----   | 2 | 4 | 1 | 31.476 | ---    | 2.8399 | ---    | ---     |      |  |
| ----   | 1 | 4 | 4 | 31.644 | ---    | 2.8252 | ---    | ---     |      |  |
| ----   | 2 | 0 | 5 | 31.722 | ---    | 2.8184 | ---    | ---     |      |  |
| 31.803 | 3 | 0 | 1 | 31.810 | 0.008  | 2.8108 | 2.8114 | -0.0007 | 13.7 |  |
| ----   | 1 | 5 | 2 | 32.054 | ---    | 2.7899 | ---    | ---     |      |  |
| ----   | 0 | 5 | 3 | 32.110 | ---    | 2.7853 | ---    | ---     |      |  |
| 32.294 | 2 | 1 | 5 | 32.253 | -0.041 | 2.7732 | 2.7697 | 0.0034  | 4.6  |  |
| ----   | 3 | 1 | 1 | 32.340 | ---    | 2.7660 | ---    | ---     |      |  |
| ----   | 1 | 2 | 6 | 32.552 | ---    | 2.7484 | ---    | ---     |      |  |
| ----   | 2 | 4 | 2 | 32.567 | ---    | 2.7472 | ---    | ---     |      |  |
| ----   | 3 | 0 | 2 | 32.891 | ---    | 2.7208 | ---    | ---     |      |  |
| 33.265 | 2 | 3 | 4 | 33.204 | -0.061 | 2.6959 | 2.6911 | 0.0048  | 16.4 |  |
| ----   | 3 | 1 | 2 | 33.405 | ---    | 2.6801 | ---    | ---     |      |  |
| ----   | 2 | 2 | 5 | 33.801 | ---    | 2.6497 | ---    | ---     |      |  |
| ----   | 1 | 5 | 3 | 33.827 | ---    | 2.6476 | ---    | ---     |      |  |
| ----   | 0 | 1 | 7 | 33.882 | ---    | 2.6435 | ---    | ---     |      |  |
| 34.080 | 3 | 2 | 1 | 33.884 | -0.197 | 2.6434 | 2.6286 | 0.0148  | 15.2 |  |
| ----   | 2 | 4 | 3 | 34.316 | ---    | 2.6110 | ---    | ---     |      |  |
| ----   | 0 | 6 | 0 | 34.579 | ---    | 2.5918 | ---    | ---     |      |  |
| ----   | 3 | 0 | 3 | 34.626 | ---    | 2.5884 | ---    | ---     |      |  |
| ----   | 1 | 4 | 5 | 34.811 | ---    | 2.5750 | ---    | ---     |      |  |
| ----   | 3 | 2 | 2 | 34.908 | ---    | 2.5681 | ---    | ---     |      |  |
| ----   | 1 | 0 | 7 | 35.037 | ---    | 2.5590 | ---    | ---     |      |  |
| ----   | 1 | 3 | 6 | 35.078 | ---    | 2.5560 | ---    | ---     |      |  |
| ----   | 3 | 1 | 3 | 35.118 | ---    | 2.5532 | ---    | ---     |      |  |
| ----   | 1 | 1 | 7 | 35.524 | ---    | 2.5250 | ---    | ---     |      |  |
| ----   | 2 | 0 | 6 | 35.552 | ---    | 2.5230 | ---    | ---     |      |  |
| ----   | 2 | 5 | 0 | 35.702 | ---    | 2.5128 | ---    | ---     |      |  |
| ----   | 0 | 6 | 2 | 35.916 | ---    | 2.4983 | ---    | ---     |      |  |
| ----   | 2 | 5 | 1 | 36.031 | ---    | 2.4906 | ---    | ---     |      |  |
| ----   | 2 | 1 | 6 | 36.033 | ---    | 2.4905 | ---    | ---     |      |  |
| ----   | 1 | 5 | 4 | 36.181 | ---    | 2.4807 | ---    | ---     |      |  |
| ----   | 2 | 3 | 5 | 36.250 | ---    | 2.4760 | ---    | ---     |      |  |
| ----   | 3 | 3 | 1 | 36.328 | ---    | 2.4709 | ---    | ---     |      |  |
| 36.425 | 1 | 6 | 1 | 36.519 | 0.093  | 2.4585 | 2.4645 | -0.0061 | 22.5 |  |
| ----   | 3 | 2 | 3 | 36.559 | ---    | 2.4559 | ---    | ---     |      |  |
| 36.716 | 2 | 4 | 4 | 36.642 | -0.074 | 2.4505 | 2.4457 | 0.0048  | 2.6  |  |
| ----   | 0 | 4 | 6 | 36.838 | ---    | 2.4379 | ---    | ---     |      |  |
| ----   | 3 | 0 | 4 | 36.935 | ---    | 2.4317 | ---    | ---     |      |  |
| ----   | 1 | 2 | 7 | 36.951 | ---    | 2.4307 | ---    | ---     |      |  |
| 37.090 | 2 | 5 | 2 | 37.003 | -0.087 | 2.4274 | 2.4219 | 0.0055  | 4.9  |  |

Electronic Supplementary Information for Dalton Transactions  
 This journal is © The Royal Society of Chemistry 2008

|        |   |   |   |        |        |        |        |         |      |
|--------|---|---|---|--------|--------|--------|--------|---------|------|
| ----   | 3 | 3 | 2 | 37.294 | ---    | 2.4091 | ---    | ---     |      |
| ----   | 3 | 1 | 4 | 37.400 | ---    | 2.4025 | ---    | ---     |      |
| ----   | 2 | 2 | 6 | 37.443 | ---    | 2.3999 | ---    | ---     |      |
| ----   | 1 | 6 | 2 | 37.480 | ---    | 2.3976 | ---    | ---     |      |
| ----   | 0 | 5 | 5 | 37.516 | ---    | 2.3954 | ---    | ---     |      |
| ----   | 0 | 3 | 7 | 37.727 | ---    | 2.3824 | ---    | ---     |      |
| ----   | 0 | 0 | 8 | 38.315 | ---    | 2.3472 | ---    | ---     |      |
| ----   | 1 | 4 | 6 | 38.370 | ---    | 2.3440 | ---    | ---     |      |
| 38.585 | 2 | 5 | 3 | 38.577 | -0.008 | 2.3319 | 2.3314 | 0.0005  | 13.5 |
| ----   | 3 | 2 | 4 | 38.768 | ---    | 2.3209 | ---    | ---     |      |
| ----   | 3 | 3 | 3 | 38.857 | ---    | 2.3157 | ---    | ---     |      |
| ----   | 1 | 5 | 5 | 39.025 | ---    | 2.3061 | ---    | ---     |      |
| ----   | 1 | 6 | 3 | 39.037 | ---    | 2.3055 | ---    | ---     |      |
| ----   | 1 | 3 | 7 | 39.230 | ---    | 2.2946 | ---    | ---     |      |
| ----   | 2 | 4 | 5 | 39.458 | ---    | 2.2818 | ---    | ---     |      |
| 39.505 | 3 | 4 | 1 | 39.530 | 0.025  | 2.2778 | 2.2792 | -0.0014 | 5.9  |
| ----   | 2 | 0 | 7 | 39.661 | ---    | 2.2706 | ---    | ---     |      |
| ----   | 0 | 6 | 4 | 39.691 | ---    | 2.2690 | ---    | ---     |      |
| ----   | 2 | 3 | 6 | 39.698 | ---    | 2.2686 | ---    | ---     |      |
| ----   | 3 | 0 | 5 | 39.733 | ---    | 2.2667 | ---    | ---     |      |
| ----   | 1 | 0 | 8 | 39.798 | ---    | 2.2631 | ---    | ---     |      |
| 39.998 | 0 | 2 | 8 | 40.094 | 0.096  | 2.2471 | 2.2522 | -0.0052 | 16.1 |
| ----   | 2 | 1 | 7 | 40.099 | ---    | 2.2468 | ---    | ---     |      |
| ----   | 3 | 1 | 5 | 40.171 | ---    | 2.2430 | ---    | ---     |      |
| ----   | 1 | 1 | 8 | 40.236 | ---    | 2.2395 | ---    | ---     |      |
| ----   | 3 | 4 | 2 | 40.431 | ---    | 2.2291 | ---    | ---     |      |
| ----   | 2 | 5 | 4 | 40.693 | ---    | 2.2154 | ---    | ---     |      |
| ----   | 2 | 6 | 0 | 40.704 | ---    | 2.2148 | ---    | ---     |      |
| ----   | 0 | 7 | 1 | 40.871 | ---    | 2.2061 | ---    | ---     |      |
| ----   | 3 | 3 | 4 | 40.961 | ---    | 2.2015 | ---    | ---     |      |
| ----   | 2 | 6 | 1 | 40.999 | ---    | 2.1995 | ---    | ---     |      |
| ----   | 1 | 6 | 4 | 41.133 | ---    | 2.1927 | ---    | ---     |      |
| ----   | 2 | 2 | 7 | 41.392 | ---    | 2.1796 | ---    | ---     |      |
| ----   | 3 | 2 | 5 | 41.461 | ---    | 2.1761 | ---    | ---     |      |
| 41.707 | 1 | 2 | 8 | 41.525 | -0.182 | 2.1729 | 2.1638 | 0.0091  | 19.8 |
| ----   | 2 | 6 | 2 | 41.873 | ---    | 2.1556 | ---    | ---     |      |
| 41.934 | 3 | 4 | 3 | 41.896 | -0.038 | 2.1545 | 2.1527 | 0.0019  | 12.2 |
| ----   | 1 | 4 | 7 | 42.246 | ---    | 2.1375 | ---    | ---     |      |
| ----   | 1 | 7 | 1 | 42.280 | ---    | 2.1358 | ---    | ---     |      |
| ----   | 1 | 5 | 6 | 42.281 | ---    | 2.1358 | ---    | ---     |      |
| 42.327 | 4 | 0 | 0 | 42.357 | 0.030  | 2.1321 | 2.1335 | -0.0014 | 3.2  |
| 42.583 | 4 | 0 | 1 | 42.642 | 0.060  | 2.1185 | 2.1213 | -0.0028 | 24.5 |
| ----   | 2 | 4 | 6 | 42.687 | ---    | 2.1164 | ---    | ---     |      |
| ----   | 4 | 1 | 0 | 42.773 | ---    | 2.1124 | ---    | ---     |      |

Electronic Supplementary Information for Dalton Transactions  
This journal is © The Royal Society of Chemistry 2008

|        |   |   |    |        |        |        |        |        |      |
|--------|---|---|----|--------|--------|--------|--------|--------|------|
| ----   | 3 | 0 | 6  | 42.945 | ---    | 2.1043 | ---    | ---    |      |
| ----   | 4 | 1 | 1  | 43.056 | ---    | 2.0991 | ---    | ---    |      |
| 43.141 | 1 | 7 | 2  | 43.132 | -0.009 | 2.0956 | 2.0952 | 0.0004 | 7.9  |
| ----   | 0 | 7 | 3  | 43.175 | ---    | 2.0936 | ---    | ---    |      |
| ----   | 2 | 5 | 5  | 43.287 | ---    | 2.0884 | ---    | ---    |      |
| ----   | 2 | 6 | 3  | 43.298 | ---    | 2.0879 | ---    | ---    |      |
| ----   | 3 | 5 | 1  | 43.354 | ---    | 2.0854 | ---    | ---    |      |
| ----   | 3 | 1 | 6  | 43.356 | ---    | 2.0853 | ---    | ---    |      |
| ----   | 2 | 3 | 7  | 43.475 | ---    | 2.0798 | ---    | ---    |      |
| ----   | 4 | 0 | 2  | 43.490 | ---    | 2.0792 | ---    | ---    |      |
| ----   | 3 | 3 | 5  | 43.542 | ---    | 2.0768 | ---    | ---    |      |
| ----   | 1 | 3 | 8  | 43.603 | ---    | 2.0740 | ---    | ---    |      |
| ----   | 1 | 6 | 5  | 43.706 | ---    | 2.0694 | ---    | ---    |      |
| ----   | 0 | 1 | 9  | 43.739 | ---    | 2.0679 | ---    | ---    |      |
| ----   | 3 | 4 | 4  | 43.879 | ---    | 2.0616 | ---    | ---    |      |
| ----   | 4 | 1 | 2  | 43.897 | ---    | 2.0608 | ---    | ---    |      |
| ----   | 2 | 0 | 8  | 43.999 | ---    | 2.0563 | ---    | ---    |      |
| ----   | 4 | 2 | 0  | 44.001 | ---    | 2.0562 | ---    | ---    |      |
| ----   | 3 | 5 | 2  | 44.191 | ---    | 2.0478 | ---    | ---    |      |
| ----   | 4 | 2 | 1  | 44.277 | ---    | 2.0440 | ---    | ---    |      |
| ----   | 2 | 1 | 8  | 44.402 | ---    | 2.0386 | ---    | ---    |      |
| ----   | 1 | 7 | 3  | 44.525 | ---    | 2.0332 | ---    | ---    |      |
| ----   | 0 | 5 | 7  | 44.568 | ---    | 2.0313 | ---    | ---    |      |
| 44.621 | 3 | 2 | 6  | 44.571 | -0.050 | 2.0312 | 2.0291 | 0.0022 | 8.8  |
| ----   | 1 | 0 | 9  | 44.676 | ---    | 2.0267 | ---    | ---    |      |
| 44.875 | 4 | 0 | 3  | 44.873 | -0.002 | 2.0182 | 2.0181 | 0.0001 | 17.9 |
| ----   | 1 | 1 | 9  | 45.075 | ---    | 2.0097 | ---    | ---    |      |
| ----   | 0 | 4 | 8  | 45.081 | ---    | 2.0094 | ---    | ---    |      |
| ----   | 4 | 2 | 2  | 45.100 | ---    | 2.0086 | ---    | ---    |      |
| ----   | 2 | 6 | 4  | 45.232 | ---    | 2.0031 | ---    | ---    |      |
| ----   | 4 | 1 | 3  | 45.270 | ---    | 2.0015 | ---    | ---    |      |
| ----   | 0 | 6 | 6  | 45.397 | ---    | 1.9962 | ---    | ---    |      |
| ----   | 0 | 0 | 12 | 58.977 | ---    | 1.5648 | ---    | ---    |      |

**The space group and cell parameter obtained from XPRD patterns of 1 at 80 °C via JADE5**

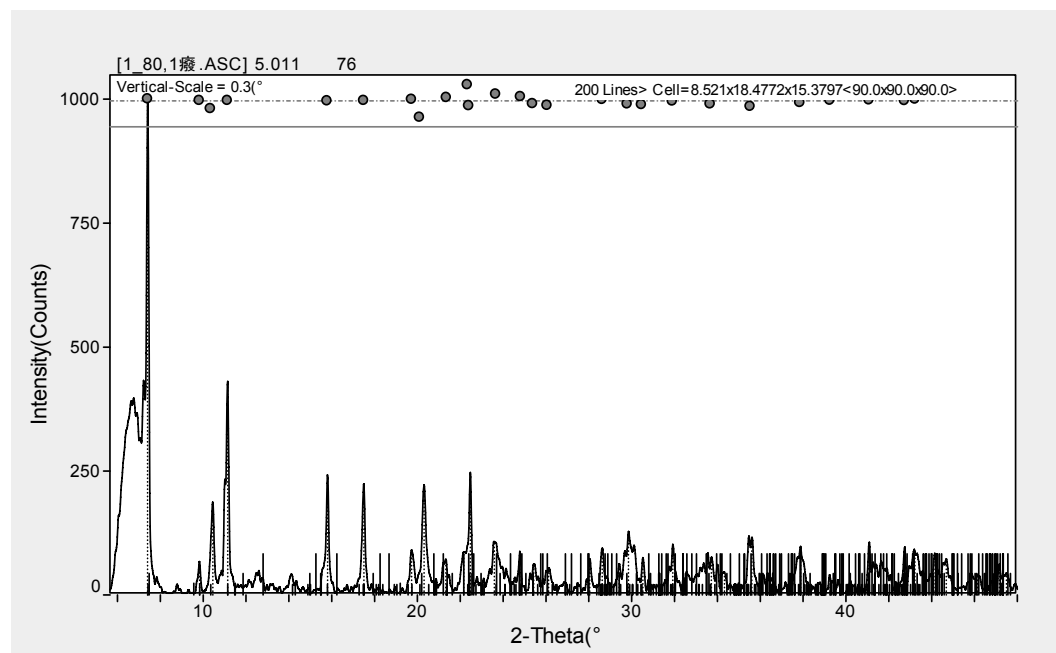

Pattern Indexing - Seek Miller Indices & Unit Cell [21 Hits Sorted on Figure-Of-Merit]

[1\_80,1°C.ASC] 5.011 762

1> fm=44, fn=8, p?=0, r?=5, C=O, Space Group=Pnma (62), a=8.396, b=17.989, c=15.806, Angle=90.00, Volume=2387.2

| @ 2T(o) | h | k | l | 2T(c)  | Delta  | d(c)    | d(o)    | Del-d   | I%    |
|---------|---|---|---|--------|--------|---------|---------|---------|-------|
| 7.409   | 0 | 1 | 1 | 7.439  | 0.030  | 11.8739 | 11.9213 | -0.0474 | 100.0 |
| 9.837   | 0 | 2 | 0 | 9.826  | -0.011 | 8.9945  | 8.9843  | 0.0102  | 6.0   |
| 11.147  | 0 | 0 | 2 | 11.186 | 0.039  | 7.9032  | 7.9310  | -0.0278 | 42.0  |
| -----   | 1 | 0 | 1 | 11.926 | ---    | 7.4147  | ---     | ---     |       |
| 12.608  | 1 | 1 | 1 | 12.903 | 0.295  | 6.8552  | 7.0150  | -0.1598 | 3.6   |
| -----   | 0 | 2 | 2 | 14.910 | ---    | 5.9369  | ---     | ---     |       |
| -----   | 1 | 0 | 2 | 15.385 | ---    | 5.7547  | ---     | ---     |       |
| -----   | 1 | 2 | 1 | 15.475 | ---    | 5.7213  | ---     | ---     |       |
| 15.807  | 0 | 3 | 1 | 15.794 | -0.013 | 5.6064  | 5.6019  | 0.0045  | 23.8  |
| -----   | 1 | 1 | 2 | 16.158 | ---    | 5.4810  | ---     | ---     |       |
| 17.505  | 0 | 1 | 3 | 17.525 | 0.020  | 5.0564  | 5.0622  | -0.0058 | 21.9  |
| -----   | 1 | 2 | 2 | 18.287 | ---    | 4.8474  | ---     | ---     |       |
| -----   | 1 | 3 | 1 | 19.019 | ---    | 4.6625  | ---     | ---     |       |
| 19.733  | 0 | 4 | 0 | 19.724 | -0.009 | 4.4972  | 4.4952  | 0.0020  | 8.5   |
| -----   | 1 | 0 | 3 | 19.878 | ---    | 4.4628  | ---     | ---     |       |
| 20.311  | 1 | 1 | 3 | 20.487 | 0.176  | 4.3315  | 4.3686  | -0.0371 | 21.0  |
| -----   | 2 | 0 | 0 | 21.146 | ---    | 4.1979  | ---     | ---     |       |
| 21.330  | 1 | 3 | 2 | 21.383 | 0.053  | 4.1520  | 4.1621  | -0.0102 | 5.8   |
| -----   | 2 | 1 | 0 | 21.721 | ---    | 4.0881  | ---     | ---     |       |
| -----   | 2 | 0 | 1 | 21.888 | ---    | 4.0572  | ---     | ---     |       |
| 22.165  | 1 | 2 | 3 | 22.218 | 0.054  | 3.9978  | 4.0073  | -0.0096 | 7.4   |

Electronic Supplementary Information for Dalton Transactions  
 This journal is © The Royal Society of Chemistry 2008

|        |   |   |   |        |        |        |        |         |      |
|--------|---|---|---|--------|--------|--------|--------|---------|------|
| ----   | 0 | 3 | 3 | 22.445 | ---    | 3.9580 | ---    | ---     |      |
| ----   | 2 | 1 | 1 | 22.445 | ---    | 3.9578 | ---    | ---     |      |
| 22.470 | 0 | 0 | 4 | 22.481 | 0.011  | 3.9516 | 3.9534 | -0.0018 | 23.3 |
| ----   | 0 | 4 | 2 | 22.731 | ---    | 3.9087 | ---    | ---     |      |
| ----   | 1 | 4 | 1 | 23.111 | ---    | 3.8452 | ---    | ---     |      |
| 23.592 | 2 | 2 | 0 | 23.366 | -0.226 | 3.8040 | 3.7680 | 0.0360  | 8.5  |
| ----   | 2 | 0 | 2 | 23.984 | ---    | 3.7074 | ---    | ---     |      |
| ----   | 2 | 2 | 1 | 24.043 | ---    | 3.6984 | ---    | ---     |      |
| ----   | 2 | 1 | 2 | 24.495 | ---    | 3.6310 | ---    | ---     |      |
| ----   | 0 | 2 | 4 | 24.586 | ---    | 3.6178 | ---    | ---     |      |
| 24.784 | 1 | 3 | 3 | 24.849 | 0.066  | 3.5801 | 3.5894 | -0.0094 | 8.0  |
| ----   | 1 | 0 | 4 | 24.883 | ---    | 3.5754 | ---    | ---     |      |
| ----   | 1 | 4 | 2 | 25.110 | ---    | 3.5435 | ---    | ---     |      |
| ----   | 0 | 5 | 1 | 25.368 | ---    | 3.5081 | ---    | ---     |      |
| 25.429 | 1 | 1 | 4 | 25.378 | -0.052 | 3.5068 | 3.4997 | 0.0070  | 5.2  |
| ----   | 2 | 3 | 0 | 25.887 | ---    | 3.4389 | ---    | ---     |      |
| 26.126 | 2 | 2 | 2 | 25.974 | -0.153 | 3.4276 | 3.4079 | 0.0197  | 4.7  |
| ----   | 2 | 3 | 1 | 26.503 | ---    | 3.3603 | ---    | ---     |      |
| ----   | 1 | 2 | 4 | 26.811 | ---    | 3.3225 | ---    | ---     |      |
| ----   | 2 | 0 | 3 | 27.138 | ---    | 3.2832 | ---    | ---     |      |
| ----   | 1 | 5 | 1 | 27.534 | ---    | 3.2369 | ---    | ---     |      |
| ----   | 2 | 1 | 3 | 27.595 | ---    | 3.2299 | ---    | ---     |      |
| 28.047 | 1 | 4 | 3 | 28.146 | 0.099  | 3.1678 | 3.1788 | -0.0110 | 6.0  |
| ----   | 2 | 3 | 2 | 28.278 | ---    | 3.1533 | ---    | ---     |      |
| 28.625 | 0 | 1 | 5 | 28.647 | 0.022  | 3.1136 | 3.1159 | -0.0023 | 8.1  |
| ----   | 2 | 2 | 3 | 28.926 | ---    | 3.0842 | ---    | ---     |      |
| ----   | 1 | 3 | 4 | 29.053 | ---    | 3.0709 | ---    | ---     |      |
| ----   | 2 | 4 | 0 | 29.075 | ---    | 3.0687 | ---    | ---     |      |
| 29.424 | 1 | 5 | 2 | 29.251 | -0.173 | 3.0506 | 3.0331 | 0.0176  | 4.7  |
| ----   | 2 | 4 | 1 | 29.630 | ---    | 3.0125 | ---    | ---     |      |
| 29.850 | 0 | 6 | 0 | 29.775 | -0.075 | 2.9982 | 2.9908 | 0.0074  | 11.3 |
| ----   | 0 | 5 | 3 | 30.051 | ---    | 2.9712 | ---    | ---     |      |
| ----   | 0 | 4 | 4 | 30.079 | ---    | 2.9685 | ---    | ---     |      |
| ----   | 1 | 0 | 5 | 30.183 | ---    | 2.9585 | ---    | ---     |      |
| 30.528 | 1 | 1 | 5 | 30.598 | 0.070  | 2.9193 | 2.9258 | -0.0065 | 6.4  |
| ----   | 2 | 3 | 3 | 31.029 | ---    | 2.8798 | ---    | ---     |      |
| ----   | 2 | 0 | 4 | 31.056 | ---    | 2.8773 | ---    | ---     |      |
| ----   | 2 | 4 | 2 | 31.241 | ---    | 2.8606 | ---    | ---     |      |
| ----   | 2 | 1 | 4 | 31.461 | ---    | 2.8412 | ---    | ---     |      |
| ----   | 1 | 2 | 5 | 31.815 | ---    | 2.8104 | ---    | ---     |      |
| ----   | 0 | 6 | 2 | 31.898 | ---    | 2.8032 | ---    | ---     |      |
| 31.924 | 1 | 5 | 3 | 31.925 | 0.001  | 2.8009 | 2.8010 | -0.0001 | 8.9  |
| ----   | 1 | 4 | 4 | 31.951 | ---    | 2.7987 | ---    | ---     |      |
| ----   | 0 | 3 | 5 | 31.978 | ---    | 2.7964 | ---    | ---     |      |

Electronic Supplementary Information for Dalton Transactions  
This journal is © The Royal Society of Chemistry 2008

|        |   |   |   |        |        |        |        |         |      |
|--------|---|---|---|--------|--------|--------|--------|---------|------|
| ----   | 1 | 6 | 1 | 32.178 | ---    | 2.7795 | ---    | ---     |      |
| ----   | 3 | 0 | 1 | 32.463 | ---    | 2.7557 | ---    | ---     |      |
| ----   | 2 | 2 | 4 | 32.648 | ---    | 2.7405 | ---    | ---     |      |
| ----   | 2 | 5 | 0 | 32.756 | ---    | 2.7318 | ---    | ---     |      |
| ----   | 3 | 1 | 1 | 32.852 | ---    | 2.7240 | ---    | ---     |      |
| ----   | 2 | 5 | 1 | 33.255 | ---    | 2.6919 | ---    | ---     |      |
| ----   | 1 | 6 | 2 | 33.679 | ---    | 2.6589 | ---    | ---     |      |
| 33.725 | 1 | 3 | 5 | 33.755 | 0.030  | 2.6531 | 2.6554 | -0.0023 | 6.5  |
| ----   | 2 | 4 | 3 | 33.774 | ---    | 2.6517 | ---    | ---     |      |
| ----   | 3 | 0 | 2 | 33.954 | ---    | 2.6381 | ---    | ---     |      |
| ----   | 3 | 2 | 1 | 33.997 | ---    | 2.6348 | ---    | ---     |      |
| ----   | 0 | 0 | 6 | 34.003 | ---    | 2.6344 | ---    | ---     |      |
| 34.336 | 3 | 1 | 2 | 34.328 | -0.007 | 2.6102 | 2.6096 | 0.0006  | 2.8  |
| ----   | 2 | 3 | 4 | 34.547 | ---    | 2.5941 | ---    | ---     |      |
| ----   | 2 | 5 | 2 | 34.716 | ---    | 2.5819 | ---    | ---     |      |
| ----   | 0 | 7 | 1 | 35.357 | ---    | 2.5365 | ---    | ---     |      |
| ----   | 1 | 5 | 4 | 35.364 | ---    | 2.5361 | ---    | ---     |      |
| ----   | 3 | 2 | 2 | 35.430 | ---    | 2.5314 | ---    | ---     |      |
| ----   | 0 | 2 | 6 | 35.477 | ---    | 2.5282 | ---    | ---     |      |
| ----   | 2 | 0 | 5 | 35.519 | ---    | 2.5253 | ---    | ---     |      |
| 35.612 | 1 | 0 | 6 | 35.691 | 0.079  | 2.5136 | 2.5189 | -0.0054 | 10.1 |
| ----   | 3 | 3 | 1 | 35.832 | ---    | 2.5040 | ---    | ---     |      |
| ----   | 2 | 1 | 5 | 35.879 | ---    | 2.5008 | ---    | ---     |      |
| ----   | 1 | 1 | 6 | 36.049 | ---    | 2.4894 | ---    | ---     |      |
| ----   | 1 | 6 | 3 | 36.060 | ---    | 2.4887 | ---    | ---     |      |
| ----   | 1 | 4 | 5 | 36.317 | ---    | 2.4716 | ---    | ---     |      |
| ----   | 3 | 0 | 3 | 36.318 | ---    | 2.4716 | ---    | ---     |      |
| ----   | 3 | 1 | 3 | 36.671 | ---    | 2.4486 | ---    | ---     |      |
| ----   | 2 | 6 | 0 | 36.808 | ---    | 2.4398 | ---    | ---     |      |
| ----   | 2 | 2 | 5 | 36.941 | ---    | 2.4313 | ---    | ---     |      |
| ----   | 1 | 7 | 1 | 36.991 | ---    | 2.4281 | ---    | ---     |      |
| ----   | 2 | 5 | 3 | 37.038 | ---    | 2.4252 | ---    | ---     |      |
| ----   | 2 | 4 | 4 | 37.061 | ---    | 2.4237 | ---    | ---     |      |
| ----   | 1 | 2 | 6 | 37.107 | ---    | 2.4208 | ---    | ---     |      |
| ----   | 3 | 3 | 2 | 37.204 | ---    | 2.4147 | ---    | ---     |      |
| ----   | 2 | 6 | 1 | 37.260 | ---    | 2.4112 | ---    | ---     |      |
| ----   | 0 | 6 | 4 | 37.628 | ---    | 2.3885 | ---    | ---     |      |
| ----   | 3 | 2 | 3 | 37.714 | ---    | 2.3832 | ---    | ---     |      |
| 37.889 | 0 | 5 | 5 | 37.854 | -0.035 | 2.3748 | 2.3726 | 0.0021  | 8.9  |
| ----   | 3 | 4 | 1 | 38.273 | ---    | 2.3497 | ---    | ---     |      |
| ----   | 1 | 7 | 2 | 38.327 | ---    | 2.3465 | ---    | ---     |      |
| ----   | 2 | 6 | 2 | 38.588 | ---    | 2.3312 | ---    | ---     |      |
| ----   | 2 | 3 | 5 | 38.655 | ---    | 2.3273 | ---    | ---     |      |
| ----   | 1 | 3 | 6 | 38.815 | ---    | 2.3181 | ---    | ---     |      |



Electronic Supplementary Information for Dalton Transactions  
This journal is © The Royal Society of Chemistry 2008

|        |   |   |   |        |        |        |        |         |     |
|--------|---|---|---|--------|--------|--------|--------|---------|-----|
| ----   | 0 | 7 | 3 | 38.962 | ---    | 2.3097 | ---    | ---     |     |
| 39.262 | 1 | 6 | 4 | 39.181 | -0.082 | 2.2973 | 2.2927 | 0.0046  | 3.1 |
| ----   | 1 | 5 | 5 | 39.399 | ---    | 2.2851 | ---    | ---     |     |
| ----   | 3 | 3 | 3 | 39.400 | ---    | 2.2851 | ---    | ---     |     |
| ----   | 3 | 0 | 4 | 39.422 | ---    | 2.2838 | ---    | ---     |     |
| ----   | 3 | 4 | 2 | 39.573 | ---    | 2.2755 | ---    | ---     |     |
| ----   | 0 | 4 | 6 | 39.616 | ---    | 2.2731 | ---    | ---     |     |
| ----   | 3 | 1 | 4 | 39.751 | ---    | 2.2657 | ---    | ---     |     |
| ----   | 0 | 8 | 0 | 40.066 | ---    | 2.2486 | ---    | ---     |     |
| ----   | 2 | 5 | 4 | 40.094 | ---    | 2.2471 | ---    | ---     |     |
| ----   | 0 | 1 | 7 | 40.217 | ---    | 2.2405 | ---    | ---     |     |
| ----   | 2 | 0 | 6 | 40.388 | ---    | 2.2314 | ---    | ---     |     |
| ----   | 1 | 7 | 3 | 40.471 | ---    | 2.2270 | ---    | ---     |     |
| ----   | 2 | 1 | 6 | 40.711 | ---    | 2.2144 | ---    | ---     |     |
| ----   | 2 | 6 | 3 | 40.721 | ---    | 2.2139 | ---    | ---     |     |
| ----   | 3 | 2 | 4 | 40.727 | ---    | 2.2136 | ---    | ---     |     |
| ----   | 2 | 4 | 5 | 40.953 | ---    | 2.2019 | ---    | ---     |     |
| 41.087 | 1 | 4 | 6 | 41.105 | 0.018  | 2.1941 | 2.1951 | -0.0009 | 9.8 |
| ----   | 2 | 7 | 0 | 41.151 | ---    | 2.1918 | ---    | ---     |     |
| ----   | 3 | 5 | 1 | 41.231 | ---    | 2.1877 | ---    | ---     |     |
| ----   | 1 | 0 | 7 | 41.372 | ---    | 2.1806 | ---    | ---     |     |
| ----   | 2 | 7 | 1 | 41.563 | ---    | 2.1710 | ---    | ---     |     |
| ----   | 3 | 4 | 3 | 41.663 | ---    | 2.1660 | ---    | ---     |     |
| ----   | 2 | 2 | 6 | 41.668 | ---    | 2.1657 | ---    | ---     |     |
| ----   | 1 | 1 | 7 | 41.689 | ---    | 2.1647 | ---    | ---     |     |
| ----   | 0 | 8 | 2 | 41.728 | ---    | 2.1628 | ---    | ---     |     |
| ----   | 1 | 8 | 1 | 41.950 | ---    | 2.1518 | ---    | ---     |     |
| ----   | 3 | 3 | 4 | 42.312 | ---    | 2.1343 | ---    | ---     |     |
| ----   | 3 | 5 | 2 | 42.455 | ---    | 2.1274 | ---    | ---     |     |
| ----   | 1 | 2 | 7 | 42.628 | ---    | 2.1192 | ---    | ---     |     |
| 42.750 | 0 | 3 | 7 | 42.755 | 0.005  | 2.1132 | 2.1134 | -0.0002 | 8.7 |
| ----   | 2 | 7 | 2 | 42.779 | ---    | 2.1120 | ---    | ---     |     |
| ----   | 1 | 6 | 5 | 42.911 | ---    | 2.1059 | ---    | ---     |     |
| ----   | 4 | 0 | 0 | 43.060 | ---    | 2.0989 | ---    | ---     |     |
| ----   | 3 | 0 | 5 | 43.135 | ---    | 2.0955 | ---    | ---     |     |
| ----   | 1 | 8 | 2 | 43.158 | ---    | 2.0944 | ---    | ---     |     |
| 43.226 | 2 | 3 | 6 | 43.225 | -0.001 | 2.0913 | 2.0912 | 0.0001  | 7.7 |
| ----   | 1 | 7 | 4 | 43.324 | ---    | 2.0867 | ---    | ---     |     |
| ----   | 4 | 1 | 0 | 43.366 | ---    | 2.0848 | ---    | ---     |     |
| ----   | 3 | 1 | 5 | 43.441 | ---    | 2.0814 | ---    | ---     |     |
| ----   | 4 | 0 | 1 | 43.457 | ---    | 2.0807 | ---    | ---     |     |
| ----   | 2 | 6 | 4 | 43.560 | ---    | 2.0760 | ---    | ---     |     |
| ----   | 2 | 5 | 5 | 43.760 | ---    | 2.0670 | ---    | ---     |     |
| ----   | 4 | 1 | 1 | 43.761 | ---    | 2.0669 | ---    | ---     |     |

Electronic Supplementary Information for Dalton Transactions  
This journal is © The Royal Society of Chemistry 2008

|        |   |   |    |        |        |        |        |         |     |
|--------|---|---|----|--------|--------|--------|--------|---------|-----|
| ----   | 1 | 5 | 6  | 43.904 | ---    | 2.0605 | ---    | ---     |     |
| 44.161 | 1 | 3 | 7  | 44.157 | -0.004 | 2.0493 | 2.0491 | 0.0002  | 7.2 |
| ----   | 4 | 2 | 0  | 44.277 | ---    | 2.0440 | ---    | ---     |     |
| ----   | 3 | 2 | 5  | 44.350 | ---    | 2.0408 | ---    | ---     |     |
| ----   | 3 | 5 | 3  | 44.433 | ---    | 2.0372 | ---    | ---     |     |
| ----   | 3 | 4 | 4  | 44.453 | ---    | 2.0363 | ---    | ---     |     |
| ----   | 3 | 6 | 1  | 44.625 | ---    | 2.0289 | ---    | ---     |     |
| ----   | 4 | 0 | 2  | 44.631 | ---    | 2.0286 | ---    | ---     |     |
| 44.689 | 4 | 2 | 1  | 44.665 | -0.024 | 2.0271 | 2.0261 | 0.0010  | 5.9 |
| ----   | 2 | 7 | 3  | 44.746 | ---    | 2.0237 | ---    | ---     |     |
| ----   | 4 | 1 | 2  | 44.929 | ---    | 2.0158 | ---    | ---     |     |
| ----   | 1 | 8 | 3  | 45.112 | ---    | 2.0081 | ---    | ---     |     |
| ----   | 2 | 4 | 6  | 45.332 | ---    | 1.9989 | ---    | ---     |     |
| ----   | 0 | 7 | 5  | 45.447 | ---    | 1.9941 | ---    | ---     |     |
| ----   | 2 | 0 | 7  | 45.579 | ---    | 1.9886 | ---    | ---     |     |
| ----   | 0 | 9 | 1  | 45.716 | ---    | 1.9830 | ---    | ---     |     |
| ----   | 2 | 8 | 0  | 45.736 | ---    | 1.9822 | ---    | ---     |     |
| ----   | 4 | 3 | 0  | 45.762 | ---    | 1.9811 | ---    | ---     |     |
| ----   | 3 | 6 | 2  | 45.775 | ---    | 1.9805 | ---    | ---     |     |
| ----   | 0 | 6 | 6  | 45.813 | ---    | 1.9790 | ---    | ---     |     |
| ----   | 4 | 2 | 2  | 45.815 | ---    | 1.9789 | ---    | ---     |     |
| ----   | 3 | 3 | 5  | 45.834 | ---    | 1.9781 | ---    | ---     |     |
| ----   | 2 | 1 | 7  | 45.872 | ---    | 1.9766 | ---    | ---     |     |
| ----   | 0 | 0 | 8  | 45.891 | ---    | 1.9758 | ---    | ---     |     |
| ----   | 2 | 8 | 1  | 46.114 | ---    | 1.9668 | ---    | ---     |     |
| 46.135 | 4 | 3 | 1  | 46.141 | 0.006  | 1.9657 | 1.9659 | -0.0002 | 2.9 |
| ----   | 1 | 4 | 7  | 46.230 | ---    | 1.9621 | ---    | ---     |     |
| ----   | 0 | 2 | 10 | 59.312 | ---    | 1.5568 | ---    | ---     |     |
| ----   | 1 | 1 | 10 | 59.700 | ---    | 1.5476 | ---    | ---     |     |

**The space group and cell parameter obtained from XPRD patterns of 1 at 190 °C via JADE5**

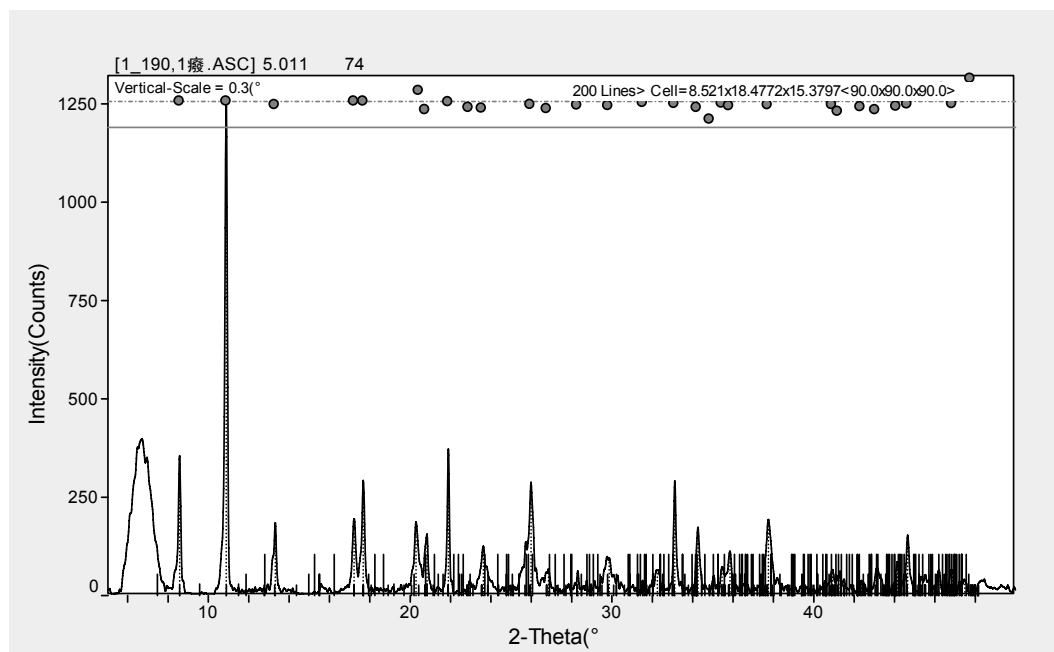

Pattern Indexing - Seek Miller Indices & Unit Cell [48 Hits Sorted on Figure-Of-Merit]

[1\_190,1°C.ASC] 5.011 740

29> fm=39, fn=9, p?=0, r?=6, C=M, Space Group=P21/c (14), a=5.320, b=16.232, c=13.771, Angle=104.71, Volume=1150.3

| @ 2T(o) | h  | k | l | 2T(c)  | Delta  | d(c)    | d(o)    | Del-d   | I%    |
|---------|----|---|---|--------|--------|---------|---------|---------|-------|
| 8.580   | 0  | 1 | 1 | 8.580  | 0.000  | 10.2967 | 10.2967 | 0.0000  | 27.5  |
| 10.892  | 0  | 2 | 0 | 10.892 | 0.000  | 8.1160  | 8.1160  | 0.0000  | 100.0 |
| ----    | 0  | 2 | 1 | 12.762 | ---    | 6.9307  | ---     | ---     |       |
| 13.324  | 0  | 0 | 2 | 13.283 | -0.040 | 6.6598  | 6.6399  | 0.0199  | 13.9  |
| ----    | 0  | 1 | 2 | 14.363 | ---    | 6.1614  | ---     | ---     |       |
| ----    | 0  | 2 | 2 | 17.209 | ---    | 5.1484  | ---     | ---     |       |
| 17.218  | 1  | 0 | 0 | 17.218 | 0.000  | 5.1459  | 5.1459  | 0.0000  | 14.9  |
| 17.677  | -1 | 1 | 1 | 17.677 | 0.000  | 5.0133  | 5.0133  | 0.0000  | 22.3  |
| ----    | 0  | 3 | 1 | 17.678 | ---    | 5.0129  | ---     | ---     |       |
| ----    | 1  | 1 | 0 | 18.069 | ---    | 4.9053  | ---     | ---     |       |
| ----    | -1 | 0 | 2 | 18.913 | ---    | 4.6884  | ---     | ---     |       |
| ----    | -1 | 1 | 2 | 19.693 | ---    | 4.5042  | ---     | ---     |       |
| ----    | -1 | 2 | 1 | 20.070 | ---    | 4.4205  | ---     | ---     |       |
| 20.294  | 1  | 2 | 0 | 20.418 | 0.124  | 4.3460  | 4.3722  | -0.0262 | 14.2  |
| ----    | 0  | 1 | 3 | 20.724 | ---    | 4.2826  | ---     | ---     |       |
| 20.837  | 1  | 1 | 1 | 20.739 | -0.098 | 4.2795  | 4.2596  | 0.0199  | 11.2  |
| ----    | 0  | 3 | 2 | 21.139 | ---    | 4.1994  | ---     | ---     |       |
| ----    | -1 | 2 | 2 | 21.875 | ---    | 4.0597  | ---     | ---     |       |
| 21.893  | 0  | 4 | 0 | 21.884 | -0.008 | 4.0580  | 4.0565  | 0.0015  | 29.0  |
| ----    | 0  | 2 | 3 | 22.811 | ---    | 3.8951  | ---     | ---     |       |

Electronic Supplementary Information for Dalton Transactions  
This journal is © The Royal Society of Chemistry 2008

|        |    |   |   |        |        |        |        |         |      |
|--------|----|---|---|--------|--------|--------|--------|---------|------|
| ----   | 1  | 2 | 1 | 22.825 | ---    | 3.8928 | ---    | ---     |      |
| 22.962 | 0  | 4 | 1 | 22.890 | -0.071 | 3.8818 | 3.8700 | 0.0119  | 1.8  |
| ----   | -1 | 1 | 3 | 23.529 | ---    | 3.7779 | ---    | ---     |      |
| 23.626 | -1 | 3 | 1 | 23.544 | -0.082 | 3.7756 | 3.7626 | 0.0129  | 9.2  |
| ----   | 1  | 3 | 0 | 23.844 | ---    | 3.7288 | ---    | ---     |      |
| ----   | 1  | 0 | 2 | 24.377 | ---    | 3.6484 | ---    | ---     |      |
| ----   | 1  | 1 | 2 | 24.995 | ---    | 3.5596 | ---    | ---     |      |
| ----   | -1 | 3 | 2 | 25.112 | ---    | 3.5432 | ---    | ---     |      |
| ----   | -1 | 2 | 3 | 25.399 | ---    | 3.5039 | ---    | ---     |      |
| ----   | 0  | 4 | 2 | 25.686 | ---    | 3.4654 | ---    | ---     |      |
| ----   | 0  | 3 | 3 | 25.938 | ---    | 3.4322 | ---    | ---     |      |
| 25.989 | 1  | 3 | 1 | 25.950 | -0.039 | 3.4306 | 3.4256 | 0.0050  | 21.6 |
| ----   | 0  | 0 | 4 | 26.750 | ---    | 3.3299 | ---    | ---     |      |
| 26.856 | 1  | 2 | 2 | 26.768 | -0.088 | 3.3277 | 3.3170 | 0.0107  | 4.6  |
| ----   | 0  | 1 | 4 | 27.317 | ---    | 3.2620 | ---    | ---     |      |
| ----   | -1 | 4 | 1 | 27.720 | ---    | 3.2155 | ---    | ---     |      |
| ----   | -1 | 0 | 4 | 27.953 | ---    | 3.1892 | ---    | ---     |      |
| ----   | 1  | 4 | 0 | 27.978 | ---    | 3.1864 | ---    | ---     |      |
| ----   | -1 | 3 | 3 | 28.258 | ---    | 3.1555 | ---    | ---     |      |
| 28.316 | 0  | 5 | 1 | 28.271 | -0.044 | 3.1541 | 3.1492 | 0.0049  | 4.0  |
| ----   | -1 | 1 | 4 | 28.499 | ---    | 3.1294 | ---    | ---     |      |
| ----   | 0  | 2 | 4 | 28.959 | ---    | 3.0807 | ---    | ---     |      |
| ----   | -1 | 4 | 2 | 29.079 | ---    | 3.0683 | ---    | ---     |      |
| ----   | 1  | 3 | 2 | 29.505 | ---    | 3.0250 | ---    | ---     |      |
| ----   | 0  | 4 | 3 | 29.803 | ---    | 2.9954 | ---    | ---     |      |
| 29.865 | 1  | 4 | 1 | 29.814 | -0.052 | 2.9943 | 2.9893 | 0.0051  | 6.5  |
| ----   | -1 | 2 | 4 | 30.081 | ---    | 2.9683 | ---    | ---     |      |
| ----   | 1  | 1 | 3 | 30.218 | ---    | 2.9551 | ---    | ---     |      |
| ----   | 0  | 5 | 2 | 30.610 | ---    | 2.9182 | ---    | ---     |      |
| 31.537 | 0  | 3 | 4 | 31.521 | -0.016 | 2.8359 | 2.8345 | 0.0014  | 1.6  |
| ----   | 1  | 2 | 3 | 31.723 | ---    | 2.8183 | ---    | ---     |      |
| ----   | -1 | 4 | 3 | 31.864 | ---    | 2.8061 | ---    | ---     |      |
| 32.245 | -1 | 5 | 1 | 32.361 | 0.116  | 2.7642 | 2.7738 | -0.0096 | 4.1  |
| ----   | -1 | 3 | 4 | 32.563 | ---    | 2.7475 | ---    | ---     |      |
| ----   | 1  | 5 | 0 | 32.585 | ---    | 2.7457 | ---    | ---     |      |
| ----   | 1  | 4 | 2 | 32.987 | ---    | 2.7131 | ---    | ---     |      |
| 33.113 | 0  | 6 | 0 | 33.085 | -0.028 | 2.7053 | 2.7031 | 0.0022  | 22.4 |
| ----   | -1 | 5 | 2 | 33.549 | ---    | 2.6690 | ---    | ---     |      |
| ----   | 0  | 6 | 1 | 33.781 | ---    | 2.6512 | ---    | ---     |      |
| ----   | -2 | 0 | 2 | 33.988 | ---    | 2.6355 | ---    | ---     |      |
| ----   | 0  | 1 | 5 | 34.078 | ---    | 2.6288 | ---    | ---     |      |
| ----   | 1  | 3 | 3 | 34.098 | ---    | 2.6273 | ---    | ---     |      |
| ----   | -1 | 1 | 5 | 34.166 | ---    | 2.6222 | ---    | ---     |      |
| ----   | 0  | 5 | 3 | 34.187 | ---    | 2.6206 | ---    | ---     |      |

Electronic Supplementary Information for Dalton Transactions  
 This journal is © The Royal Society of Chemistry 2008

|        |    |   |   |        |        |        |        |        |      |
|--------|----|---|---|--------|--------|--------|--------|--------|------|
| ----   | -2 | 1 | 1 | 34.194 | ---    | 2.6201 | ---    | ---    |      |
| 34.268 | 1  | 5 | 1 | 34.197 | -0.071 | 2.6199 | 2.6146 | 0.0053 | 13.1 |
| ----   | -2 | 1 | 2 | 34.447 | ---    | 2.6014 | ---    | ---    |      |
| ----   | 0  | 4 | 4 | 34.823 | ---    | 2.5742 | ---    | ---    |      |
| 35.049 | 2  | 0 | 0 | 34.840 | -0.209 | 2.5730 | 2.5581 | 0.0149 | 3.1  |
| ----   | 2  | 1 | 0 | 35.289 | ---    | 2.5412 | ---    | ---    |      |
| 35.459 | 0  | 2 | 5 | 35.436 | -0.024 | 2.5311 | 2.5294 | 0.0016 | 4.8  |
| ----   | -1 | 2 | 5 | 35.521 | ---    | 2.5252 | ---    | ---    |      |
| ----   | -2 | 2 | 1 | 35.548 | ---    | 2.5233 | ---    | ---    |      |
| ----   | 1  | 0 | 4 | 35.609 | ---    | 2.5191 | ---    | ---    |      |
| ----   | -1 | 4 | 4 | 35.780 | ---    | 2.5075 | ---    | ---    |      |
| ----   | -2 | 2 | 2 | 35.793 | ---    | 2.5067 | ---    | ---    |      |
| 35.849 | 0  | 6 | 2 | 35.796 | -0.053 | 2.5064 | 2.5028 | 0.0036 | 8.0  |
| ----   | -2 | 1 | 3 | 36.022 | ---    | 2.4912 | ---    | ---    |      |
| ----   | -1 | 5 | 3 | 36.025 | ---    | 2.4910 | ---    | ---    |      |
| ----   | 1  | 1 | 4 | 36.050 | ---    | 2.4893 | ---    | ---    |      |
| ----   | 2  | 2 | 0 | 36.608 | ---    | 2.4527 | ---    | ---    |      |
| ----   | 1  | 5 | 2 | 37.036 | ---    | 2.4253 | ---    | ---    |      |
| ----   | 1  | 4 | 3 | 37.198 | ---    | 2.4151 | ---    | ---    |      |
| ----   | -2 | 2 | 3 | 37.318 | ---    | 2.4076 | ---    | ---    |      |
| ----   | -1 | 6 | 1 | 37.331 | ---    | 2.4068 | ---    | ---    |      |
| ----   | 1  | 2 | 4 | 37.346 | ---    | 2.4059 | ---    | ---    |      |
| ----   | 1  | 6 | 0 | 37.529 | ---    | 2.3946 | ---    | ---    |      |
| ----   | 0  | 3 | 5 | 37.604 | ---    | 2.3900 | ---    | ---    |      |
| ----   | 2  | 1 | 1 | 37.630 | ---    | 2.3884 | ---    | ---    |      |
| ----   | -1 | 3 | 5 | 37.685 | ---    | 2.3850 | ---    | ---    |      |
| 37.753 | -2 | 3 | 1 | 37.711 | -0.042 | 2.3834 | 2.3808 | 0.0026 | 14.5 |
| ----   | -2 | 3 | 2 | 37.943 | ---    | 2.3694 | ---    | ---    |      |
| ----   | -2 | 0 | 4 | 38.367 | ---    | 2.3442 | ---    | ---    |      |
| ----   | -1 | 6 | 2 | 38.383 | ---    | 2.3432 | ---    | ---    |      |
| ----   | 0  | 5 | 4 | 38.704 | ---    | 2.3245 | ---    | ---    |      |
| ----   | 2  | 3 | 0 | 38.720 | ---    | 2.3236 | ---    | ---    |      |
| ----   | -2 | 1 | 4 | 38.781 | ---    | 2.3201 | ---    | ---    |      |
| ----   | 2  | 2 | 1 | 38.880 | ---    | 2.3144 | ---    | ---    |      |
| ----   | 0  | 6 | 3 | 38.953 | ---    | 2.3102 | ---    | ---    |      |
| ----   | 1  | 6 | 1 | 38.961 | ---    | 2.3098 | ---    | ---    |      |
| ----   | -2 | 3 | 3 | 39.398 | ---    | 2.2852 | ---    | ---    |      |
| ----   | 0  | 7 | 1 | 39.410 | ---    | 2.2845 | ---    | ---    |      |
| ----   | 1  | 3 | 4 | 39.424 | ---    | 2.2837 | ---    | ---    |      |
| ----   | -1 | 5 | 4 | 39.580 | ---    | 2.2751 | ---    | ---    |      |
| ----   | -1 | 0 | 6 | 39.902 | ---    | 2.2574 | ---    | ---    |      |
| ----   | -2 | 2 | 4 | 40.001 | ---    | 2.2521 | ---    | ---    |      |
| ----   | -1 | 1 | 6 | 40.303 | ---    | 2.2359 | ---    | ---    |      |
| ----   | 0  | 4 | 5 | 40.472 | ---    | 2.2270 | ---    | ---    |      |

Electronic Supplementary Information for Dalton Transactions  
This journal is © The Royal Society of Chemistry 2008

|        |    |   |   |        |        |        |        |        |      |
|--------|----|---|---|--------|--------|--------|--------|--------|------|
| ----   | -1 | 4 | 5 | 40.548 | ---    | 2.2230 | ---    | ---    |      |
| ----   | -2 | 4 | 1 | 40.573 | ---    | 2.2217 | ---    | ---    |      |
| ----   | -1 | 6 | 3 | 40.604 | ---    | 2.2200 | ---    | ---    |      |
| ----   | 0  | 0 | 6 | 40.606 | ---    | 2.2199 | ---    | ---    |      |
| ----   | 2  | 0 | 2 | 40.639 | ---    | 2.2182 | ---    | ---    |      |
| ----   | -2 | 4 | 2 | 40.791 | ---    | 2.2103 | ---    | ---    |      |
| ----   | 1  | 5 | 3 | 40.885 | ---    | 2.2054 | ---    | ---    |      |
| 40.932 | 2  | 3 | 1 | 40.892 | -0.040 | 2.2051 | 2.2030 | 0.0021 | 4.3  |
| ----   | 0  | 1 | 6 | 41.001 | ---    | 2.1995 | ---    | ---    |      |
| ----   | 2  | 1 | 2 | 41.033 | ---    | 2.1978 | ---    | ---    |      |
| 41.305 | 0  | 7 | 2 | 41.188 | -0.117 | 2.1899 | 2.1840 | 0.0059 | 4.1  |
| ----   | -1 | 2 | 6 | 41.486 | ---    | 2.1749 | ---    | ---    |      |
| ----   | 1  | 6 | 2 | 41.521 | ---    | 2.1731 | ---    | ---    |      |
| ----   | 2  | 4 | 0 | 41.523 | ---    | 2.1730 | ---    | ---    |      |
| ----   | -2 | 3 | 4 | 41.968 | ---    | 2.1510 | ---    | ---    |      |
| ----   | -2 | 4 | 3 | 42.164 | ---    | 2.1415 | ---    | ---    |      |
| ----   | 0  | 2 | 6 | 42.167 | ---    | 2.1413 | ---    | ---    |      |
| ----   | 1  | 4 | 4 | 42.188 | ---    | 2.1403 | ---    | ---    |      |
| ----   | 2  | 2 | 2 | 42.199 | ---    | 2.1397 | ---    | ---    |      |
| 42.375 | 1  | 1 | 5 | 42.310 | -0.065 | 2.1344 | 2.1312 | 0.0031 | 2.1  |
| ----   | -2 | 1 | 5 | 42.529 | ---    | 2.1239 | ---    | ---    |      |
| ----   | -1 | 7 | 1 | 42.557 | ---    | 2.1225 | ---    | ---    |      |
| ----   | 1  | 7 | 0 | 42.735 | ---    | 2.1141 | ---    | ---    |      |
| 43.142 | 0  | 6 | 4 | 43.043 | -0.099 | 2.0997 | 2.0951 | 0.0046 | 4.9  |
| ----   | -1 | 3 | 6 | 43.398 | ---    | 2.0834 | ---    | ---    |      |
| ----   | 1  | 2 | 5 | 43.448 | ---    | 2.0811 | ---    | ---    |      |
| ----   | -1 | 7 | 2 | 43.504 | ---    | 2.0785 | ---    | ---    |      |
| ----   | 2  | 4 | 1 | 43.580 | ---    | 2.0751 | ---    | ---    |      |
| ----   | -2 | 2 | 5 | 43.662 | ---    | 2.0714 | ---    | ---    |      |
| ----   | -1 | 6 | 4 | 43.847 | ---    | 2.0631 | ---    | ---    |      |
| ----   | 0  | 5 | 5 | 43.930 | ---    | 2.0593 | ---    | ---    |      |
| ----   | -1 | 5 | 5 | 44.001 | ---    | 2.0562 | ---    | ---    |      |
| ----   | 0  | 7 | 3 | 44.019 | ---    | 2.0554 | ---    | ---    |      |
| ----   | -2 | 5 | 1 | 44.024 | ---    | 2.0552 | ---    | ---    |      |
| ----   | 1  | 7 | 1 | 44.026 | ---    | 2.0551 | ---    | ---    |      |
| ----   | 0  | 3 | 6 | 44.055 | ---    | 2.0538 | ---    | ---    |      |
| 44.145 | 2  | 3 | 2 | 44.086 | -0.059 | 2.0524 | 2.0498 | 0.0026 | 6.0  |
| ----   | -2 | 5 | 2 | 44.229 | ---    | 2.0461 | ---    | ---    |      |
| ----   | -2 | 4 | 4 | 44.603 | ---    | 2.0298 | ---    | ---    |      |
| 44.656 | 0  | 8 | 0 | 44.622 | -0.034 | 2.0290 | 2.0275 | 0.0015 | 11.3 |
| ----   | 2  | 5 | 0 | 44.915 | ---    | 2.0164 | ---    | ---    |      |
| ----   | 1  | 6 | 3 | 45.051 | ---    | 2.0107 | ---    | ---    |      |
| ----   | 0  | 8 | 1 | 45.165 | ---    | 2.0059 | ---    | ---    |      |
| ----   | 1  | 3 | 5 | 45.293 | ---    | 2.0005 | ---    | ---    |      |

Electronic Supplementary Information for Dalton Transactions  
This journal is © The Royal Society of Chemistry 2008

|        |    |   |   |        |        |        |        |             |
|--------|----|---|---|--------|--------|--------|--------|-------------|
| ----   | 2  | 1 | 3 | 45.307 | ---    | 1.9999 | ---    | ---         |
| ----   | -2 | 3 | 5 | 45.501 | ---    | 1.9919 | ---    | ---         |
| ----   | -2 | 5 | 3 | 45.517 | ---    | 1.9912 | ---    | ---         |
| ----   | -1 | 7 | 3 | 45.519 | ---    | 1.9911 | ---    | ---         |
| ----   | 1  | 5 | 4 | 45.540 | ---    | 1.9902 | ---    | ---         |
| ----   | -1 | 4 | 6 | 45.967 | ---    | 1.9727 | ---    | ---         |
| 46.202 | 1  | 7 | 2 | 46.357 | 0.155  | 1.9570 | 1.9632 | -0.0062 4.1 |
| ----   | 2  | 2 | 3 | 46.386 | ---    | 1.9559 | ---    | ---         |
| ----   | 0  | 4 | 6 | 46.595 | ---    | 1.9476 | ---    | ---         |
| ----   | 2  | 4 | 2 | 46.625 | ---    | 1.9464 | ---    | ---         |
| ----   | -2 | 0 | 6 | 46.730 | ---    | 1.9423 | ---    | ---         |
| ----   | 0  | 8 | 2 | 46.764 | ---    | 1.9409 | ---    | ---         |
| ----   | -1 | 1 | 7 | 46.806 | ---    | 1.9393 | ---    | ---         |
| 46.881 | 2  | 5 | 1 | 46.852 | -0.029 | 1.9375 | 1.9364 | 0.0011 3.9  |
| ----   | -2 | 1 | 6 | 47.083 | ---    | 1.9285 | ---    | ---         |
| 47.492 | 0  | 7 | 4 | 47.756 | 0.264  | 1.9029 | 1.9129 | -0.0099 2.1 |
| ----   | 1  | 4 | 5 | 47.782 | ---    | 1.9019 | ---    | ---         |
| ----   | -2 | 5 | 4 | 47.820 | ---    | 1.9005 | ---    | ---         |
| ----   | -1 | 2 | 7 | 47.859 | ---    | 1.8991 | ---    | ---         |
| ----   | 0  | 6 | 5 | 47.883 | ---    | 1.8982 | ---    | ---         |
| ----   | -1 | 6 | 5 | 47.950 | ---    | 1.8957 | ---    | ---         |
| ----   | -2 | 6 | 1 | 47.971 | ---    | 1.8949 | ---    | ---         |
| ----   | -2 | 4 | 5 | 47.981 | ---    | 1.8945 | ---    | ---         |
| ----   | -1 | 8 | 1 | 48.007 | ---    | 1.8936 | ---    | ---         |
| ----   | 0  | 1 | 7 | 48.106 | ---    | 1.8899 | ---    | ---         |
| ----   | -2 | 2 | 6 | 48.131 | ---    | 1.8889 | ---    | ---         |
| ----   | 2  | 3 | 3 | 48.143 | ---    | 1.8885 | ---    | ---         |
| ----   | -2 | 6 | 2 | 48.163 | ---    | 1.8878 | ---    | ---         |
| ----   | -1 | 0 | 8 | 53.314 | ---    | 1.7169 | ---    | ---         |
| ----   | -1 | 1 | 8 | 53.635 | ---    | 1.7074 | ---    | ---         |
| ----   | -1 | 2 | 8 | 54.590 | ---    | 1.6797 | ---    | ---         |
| ----   | 0  | 0 | 8 | 55.116 | ---    | 1.6650 | ---    | ---         |
| 55.503 | 0  | 1 | 8 | 55.429 | -0.073 | 1.6563 | 1.6543 | 0.0020 2.4  |
| 56.146 | -1 | 3 | 8 | 56.158 | 0.012  | 1.6365 | 1.6368 | -0.0003 2.0 |
| ----   | 0  | 2 | 8 | 56.364 | ---    | 1.6310 | ---    | ---         |
| ----   | -2 | 0 | 8 | 57.770 | ---    | 1.5946 | ---    | ---         |
| ----   | 0  | 3 | 8 | 57.901 | ---    | 1.5913 | ---    | ---         |
| ----   | -2 | 1 | 8 | 58.074 | ---    | 1.5870 | ---    | ---         |
| ----   | -1 | 4 | 8 | 58.307 | ---    | 1.5812 | ---    | ---         |
| ----   | -2 | 2 | 8 | 58.982 | ---    | 1.5647 | ---    | ---         |

**The space group and cell parameter obtained from XPRD patterns of complex 1 via JADE5 after 1 was cooled down to room temperature and exposed to air for 48 hours**

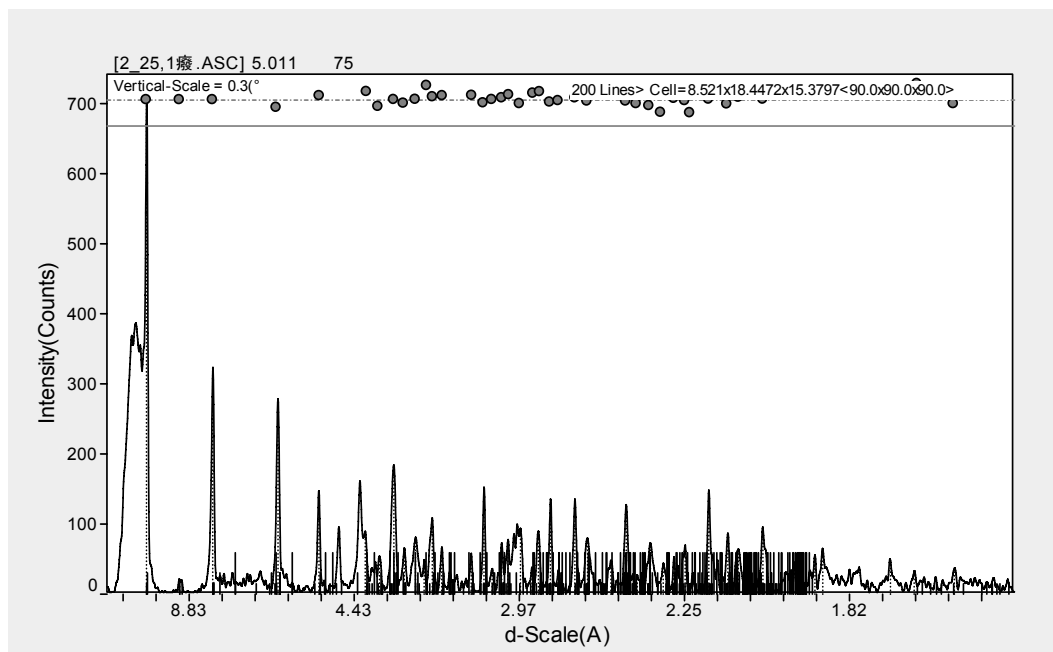

Pattern Indexing - Seek Miller Indices & Unit Cell [36 Hits Sorted on Figure-Of-Merit]

[2\_25,1癩.ASC] 5.011 759

8> fm=48, fn=9, p?=0, r?=10, C=O, Space Group=Pnma (62), a=8.485, b=15.392, c=18.743, Angle=90.00, Volume=2447.9

| @ 2T(o) | h | k | l | 2T(c)  | Delta  | d(c)    | d(o)    | Del-d   | I%    |
|---------|---|---|---|--------|--------|---------|---------|---------|-------|
| 7.426   | 0 | 1 | 1 | 7.426  | 0.000  | 11.8951 | 11.8951 | 0.0000  | 100.0 |
| 9.429   | 0 | 0 | 2 | 9.429  | 0.000  | 9.3714  | 9.3714  | 0.0000  | 2.4   |
| 11.438  | 1 | 0 | 1 | 11.438 | 0.000  | 7.7300  | 7.7300  | 0.0000  | 44.9  |
| ----    | 0 | 2 | 0 | 11.488 | ---    | 7.6960  | ---     | ---     |       |
| ----    | 1 | 1 | 1 | 12.805 | ---    | 6.9078  | ---     | ---     |       |
| ----    | 1 | 0 | 2 | 14.068 | ---    | 6.2900  | ---     | ---     |       |
| ----    | 0 | 2 | 2 | 14.883 | ---    | 5.9475  | ---     | ---     |       |
| ----    | 1 | 1 | 2 | 15.204 | ---    | 5.8226  | ---     | ---     |       |
| 15.381  | 0 | 1 | 3 | 15.293 | -0.088 | 5.7889  | 5.7560  | 0.0330  | 38.5  |
| ----    | 1 | 2 | 1 | 16.239 | ---    | 5.4539  | ---     | ---     |       |
| ----    | 1 | 0 | 3 | 17.614 | ---    | 5.0310  | ---     | ---     |       |
| 17.862  | 0 | 3 | 1 | 17.910 | 0.047  | 4.9486  | 4.9616  | -0.0129 | 20.4  |
| ----    | 1 | 2 | 2 | 18.200 | ---    | 4.8703  | ---     | ---     |       |
| ----    | 1 | 1 | 3 | 18.539 | ---    | 4.7820  | ---     | ---     |       |
| ----    | 0 | 0 | 4 | 18.923 | ---    | 4.6857  | ---     | ---     |       |
| 20.668  | 1 | 3 | 1 | 20.762 | 0.094  | 4.2748  | 4.2940  | -0.0192 | 10.9  |
| ----    | 2 | 0 | 0 | 20.921 | ---    | 4.2426  | ---     | ---     |       |
| ----    | 1 | 2 | 3 | 21.080 | ---    | 4.2111  | ---     | ---     |       |
| 21.535  | 2 | 0 | 1 | 21.456 | -0.078 | 4.1379  | 4.1231  | 0.0149  | 5.9   |



Electronic Supplementary Information for Dalton Transactions  
 This journal is © The Royal Society of Chemistry 2008

|        |   |   |   |        |        |        |        |              |
|--------|---|---|---|--------|--------|--------|--------|--------------|
| ----   | 1 | 0 | 4 | 21.647 | ---    | 4.1019 | ---    | ---          |
| ----   | 2 | 1 | 0 | 21.710 | ---    | 4.0901 | ---    | ---          |
| ----   | 0 | 2 | 4 | 22.193 | ---    | 4.0023 | ---    | ---          |
| ----   | 2 | 1 | 1 | 22.228 | ---    | 3.9961 | ---    | ---          |
| ----   | 1 | 3 | 2 | 22.343 | ---    | 3.9758 | ---    | ---          |
| 22.402 | 0 | 3 | 3 | 22.404 | 0.002  | 3.9650 | 3.9654 | -0.0003 24.8 |
| ----   | 1 | 1 | 4 | 22.413 | ---    | 3.9635 | ---    | ---          |
| 23.032 | 2 | 0 | 2 | 22.992 | -0.040 | 3.8650 | 3.8583 | 0.0067 7.2   |
| ----   | 0 | 4 | 0 | 23.094 | ---    | 3.8480 | ---    | ---          |
| 23.712 | 2 | 1 | 2 | 23.716 | 0.004  | 3.7486 | 3.7492 | -0.0006 9.3  |
| ----   | 2 | 2 | 0 | 23.930 | ---    | 3.7155 | ---    | ---          |
| 24.239 | 2 | 2 | 1 | 24.403 | 0.164  | 3.6445 | 3.6688 | -0.0242 5.4  |
| ----   | 0 | 1 | 5 | 24.420 | ---    | 3.6421 | ---    | ---          |
| ----   | 1 | 2 | 4 | 24.572 | ---    | 3.6198 | ---    | ---          |
| 24.731 | 1 | 3 | 3 | 24.764 | 0.034  | 3.5922 | 3.5970 | -0.0048 13.6 |
| ----   | 0 | 4 | 2 | 24.995 | ---    | 3.5596 | ---    | ---          |
| 25.309 | 2 | 0 | 3 | 25.355 | 0.046  | 3.5098 | 3.5161 | -0.0062 8.4  |
| ----   | 2 | 2 | 2 | 25.773 | ---    | 3.4539 | ---    | ---          |
| ----   | 1 | 4 | 1 | 25.842 | ---    | 3.4448 | ---    | ---          |
| ----   | 1 | 0 | 5 | 25.964 | ---    | 3.4289 | ---    | ---          |
| ----   | 2 | 1 | 3 | 26.017 | ---    | 3.4220 | ---    | ---          |
| ----   | 1 | 1 | 5 | 26.612 | ---    | 3.3468 | ---    | ---          |
| 27.093 | 1 | 4 | 2 | 27.144 | 0.051  | 3.2825 | 3.2885 | -0.0060 7.5  |
| ----   | 2 | 3 | 0 | 27.253 | ---    | 3.2696 | ---    | ---          |
| ----   | 2 | 3 | 1 | 27.672 | ---    | 3.2209 | ---    | ---          |
| 27.860 | 1 | 3 | 4 | 27.823 | -0.037 | 3.2038 | 3.1997 | 0.0041 20.8  |
| ----   | 2 | 2 | 3 | 27.916 | ---    | 3.1934 | ---    | ---          |
| 28.353 | 2 | 0 | 4 | 28.354 | 0.002  | 3.1450 | 3.1452 | -0.0002 4.0  |
| ----   | 1 | 2 | 5 | 28.474 | ---    | 3.1321 | ---    | ---          |
| ----   | 0 | 0 | 6 | 28.551 | ---    | 3.1238 | ---    | ---          |
| ----   | 2 | 3 | 2 | 28.898 | ---    | 3.0871 | ---    | ---          |
| 28.930 | 2 | 1 | 4 | 28.953 | 0.022  | 3.0813 | 3.0837 | -0.0023 9.1  |
| ----   | 1 | 4 | 3 | 29.194 | ---    | 3.0565 | ---    | ---          |
| 29.321 | 0 | 5 | 1 | 29.378 | 0.057  | 3.0377 | 3.0435 | -0.0058 9.1  |
| ----   | 0 | 3 | 5 | 29.486 | ---    | 3.0268 | ---    | ---          |
| 30.069 | 0 | 4 | 4 | 30.024 | -0.045 | 2.9738 | 2.9694 | 0.0043 11.6  |
| ----   | 1 | 0 | 6 | 30.468 | ---    | 2.9315 | ---    | ---          |
| ----   | 2 | 2 | 4 | 30.684 | ---    | 2.9113 | ---    | ---          |
| 30.765 | 2 | 3 | 3 | 30.841 | 0.076  | 2.8969 | 2.9038 | -0.0070 3.7  |
| ----   | 0 | 2 | 6 | 30.867 | ---    | 2.8945 | ---    | ---          |
| ----   | 1 | 1 | 6 | 31.029 | ---    | 2.8797 | ---    | ---          |
| 31.157 | 1 | 5 | 1 | 31.249 | 0.092  | 2.8600 | 2.8682 | -0.0082 11.0 |
| ----   | 1 | 3 | 5 | 31.352 | ---    | 2.8508 | ---    | ---          |
| ----   | 2 | 4 | 0 | 31.358 | ---    | 2.8503 | ---    | ---          |

Electronic Supplementary Information for Dalton Transactions  
This journal is © The Royal Society of Chemistry 2008

|        |   |   |   |        |        |        |        |         |      |
|--------|---|---|---|--------|--------|--------|--------|---------|------|
| ----   | 2 | 4 | 1 | 31.728 | ---    | 2.8179 | ---    | ---     |      |
| ----   | 2 | 0 | 5 | 31.829 | ---    | 2.8092 | ---    | ---     |      |
| 31.889 | 1 | 4 | 4 | 31.861 | -0.028 | 2.8064 | 2.8040 | 0.0024  | 18.1 |
| ----   | 3 | 0 | 1 | 31.974 | ---    | 2.7968 | ---    | ---     |      |
| ----   | 1 | 5 | 2 | 32.351 | ---    | 2.7650 | ---    | ---     |      |
| 32.381 | 2 | 1 | 5 | 32.369 | -0.012 | 2.7635 | 2.7625 | 0.0010  | 4.0  |
| ----   | 0 | 5 | 3 | 32.395 | ---    | 2.7614 | ---    | ---     |      |
| ----   | 3 | 1 | 1 | 32.512 | ---    | 2.7517 | ---    | ---     |      |
| ----   | 1 | 2 | 6 | 32.661 | ---    | 2.7395 | ---    | ---     |      |
| ----   | 2 | 4 | 2 | 32.815 | ---    | 2.7269 | ---    | ---     |      |
| ----   | 3 | 0 | 2 | 33.054 | ---    | 2.7078 | ---    | ---     |      |
| 33.367 | 2 | 3 | 4 | 33.390 | 0.022  | 2.6813 | 2.6831 | -0.0017 | 18.0 |
| ----   | 3 | 1 | 2 | 33.577 | ---    | 2.6668 | ---    | ---     |      |
| ----   | 2 | 2 | 5 | 33.943 | ---    | 2.6389 | ---    | ---     |      |
| ----   | 0 | 1 | 7 | 33.956 | ---    | 2.6379 | ---    | ---     |      |
| ----   | 3 | 2 | 1 | 34.080 | ---    | 2.6286 | ---    | ---     |      |
| 34.132 | 1 | 5 | 3 | 34.117 | -0.015 | 2.6258 | 2.6247 | 0.0011  | 9.9  |
| ----   | 2 | 4 | 3 | 34.560 | ---    | 2.5932 | ---    | ---     |      |
| ----   | 3 | 0 | 3 | 34.788 | ---    | 2.5767 | ---    | ---     |      |
| ----   | 0 | 6 | 0 | 34.947 | ---    | 2.5653 | ---    | ---     |      |
| ----   | 1 | 4 | 5 | 35.022 | ---    | 2.5600 | ---    | ---     |      |
| ----   | 3 | 2 | 2 | 35.103 | ---    | 2.5543 | ---    | ---     |      |
| ----   | 1 | 0 | 7 | 35.115 | ---    | 2.5534 | ---    | ---     |      |
| ----   | 1 | 3 | 6 | 35.231 | ---    | 2.5453 | ---    | ---     |      |
| ----   | 3 | 1 | 3 | 35.288 | ---    | 2.5413 | ---    | ---     |      |
| 35.544 | 1 | 1 | 7 | 35.611 | 0.067  | 2.5190 | 2.5236 | -0.0046 | 5.8  |
| ----   | 2 | 0 | 6 | 35.662 | ---    | 2.5155 | ---    | ---     |      |
| ----   | 2 | 5 | 0 | 36.016 | ---    | 2.4916 | ---    | ---     |      |
| ----   | 2 | 1 | 6 | 36.152 | ---    | 2.4826 | ---    | ---     |      |
| ----   | 0 | 6 | 2 | 36.276 | ---    | 2.4743 | ---    | ---     |      |
| ----   | 2 | 5 | 1 | 36.344 | ---    | 2.4699 | ---    | ---     |      |
| ----   | 2 | 3 | 5 | 36.434 | ---    | 2.4640 | ---    | ---     |      |
| 36.478 | 1 | 5 | 4 | 36.462 | -0.016 | 2.4622 | 2.4611 | 0.0011  | 17.0 |
| ----   | 3 | 3 | 1 | 36.562 | ---    | 2.4556 | ---    | ---     |      |
| ----   | 3 | 2 | 3 | 36.752 | ---    | 2.4434 | ---    | ---     |      |
| ----   | 2 | 4 | 4 | 36.881 | ---    | 2.4351 | ---    | ---     |      |
| ----   | 1 | 6 | 1 | 36.887 | ---    | 2.4348 | ---    | ---     |      |
| ----   | 0 | 4 | 6 | 37.036 | ---    | 2.4253 | ---    | ---     |      |
| ----   | 1 | 2 | 7 | 37.064 | ---    | 2.4235 | ---    | ---     |      |
| 37.141 | 3 | 0 | 4 | 37.097 | -0.044 | 2.4215 | 2.4187 | 0.0028  | 2.5  |
| ----   | 2 | 5 | 2 | 37.312 | ---    | 2.4080 | ---    | ---     |      |
| ----   | 3 | 3 | 2 | 37.526 | ---    | 2.3947 | ---    | ---     |      |
| ----   | 3 | 1 | 4 | 37.570 | ---    | 2.3921 | ---    | ---     |      |
| ----   | 2 | 2 | 6 | 37.587 | ---    | 2.3910 | ---    | ---     |      |

Electronic Supplementary Information for Dalton Transactions  
 This journal is © The Royal Society of Chemistry 2008

|        |   |   |   |        |        |        |        |         |      |
|--------|---|---|---|--------|--------|--------|--------|---------|------|
| ----   | 0 | 5 | 5 | 37.784 | ---    | 2.3790 | ---    | ---     |      |
| ----   | 1 | 6 | 2 | 37.843 | ---    | 2.3754 | ---    | ---     |      |
| 37.940 | 0 | 3 | 7 | 37.870 | -0.070 | 2.3738 | 2.3696 | 0.0042  | 9.1  |
| ----   | 0 | 0 | 8 | 38.389 | ---    | 2.3429 | ---    | ---     |      |
| 38.723 | 1 | 4 | 6 | 38.577 | -0.146 | 2.3319 | 2.3234 | 0.0084  | 4.8  |
| ----   | 2 | 5 | 3 | 38.881 | ---    | 2.3144 | ---    | ---     |      |
| ----   | 3 | 2 | 4 | 38.960 | ---    | 2.3098 | ---    | ---     |      |
| ----   | 3 | 3 | 3 | 39.087 | ---    | 2.3026 | ---    | ---     |      |
| ----   | 1 | 5 | 5 | 39.299 | ---    | 2.2907 | ---    | ---     |      |
| 39.368 | 1 | 3 | 7 | 39.383 | 0.015  | 2.2860 | 2.2868 | -0.0008 | 6.4  |
| ----   | 1 | 6 | 3 | 39.394 | ---    | 2.2854 | ---    | ---     |      |
| ----   | 2 | 4 | 5 | 39.692 | ---    | 2.2689 | ---    | ---     |      |
| ----   | 2 | 0 | 7 | 39.776 | ---    | 2.2643 | ---    | ---     |      |
| ----   | 3 | 4 | 1 | 39.812 | ---    | 2.2623 | ---    | ---     |      |
| ----   | 2 | 3 | 6 | 39.880 | ---    | 2.2586 | ---    | ---     |      |
| ----   | 1 | 0 | 8 | 39.885 | ---    | 2.2584 | ---    | ---     |      |
| ----   | 3 | 0 | 5 | 39.895 | ---    | 2.2578 | ---    | ---     |      |
| 40.048 | 0 | 6 | 4 | 40.036 | -0.011 | 2.2502 | 2.2496 | 0.0006  | 9.1  |
| ----   | 0 | 2 | 8 | 40.202 | ---    | 2.2413 | ---    | ---     |      |
| ----   | 2 | 1 | 7 | 40.222 | ---    | 2.2402 | ---    | ---     |      |
| ----   | 1 | 1 | 8 | 40.331 | ---    | 2.2344 | ---    | ---     |      |
| 40.491 | 3 | 1 | 5 | 40.341 | -0.151 | 2.2339 | 2.2260 | 0.0080  | 3.1  |
| ----   | 3 | 4 | 2 | 40.711 | ---    | 2.2145 | ---    | ---     |      |
| ----   | 2 | 5 | 4 | 40.991 | ---    | 2.1999 | ---    | ---     |      |
| ----   | 2 | 6 | 0 | 41.083 | ---    | 2.1952 | ---    | ---     |      |
| ----   | 3 | 3 | 4 | 41.189 | ---    | 2.1898 | ---    | ---     |      |
| ----   | 0 | 7 | 1 | 41.306 | ---    | 2.1839 | ---    | ---     |      |
| ----   | 2 | 6 | 1 | 41.377 | ---    | 2.1803 | ---    | ---     |      |
| 41.477 | 1 | 6 | 4 | 41.483 | 0.006  | 2.1750 | 2.1753 | -0.0003 | 20.1 |
| ----   | 2 | 2 | 7 | 41.538 | ---    | 2.1723 | ---    | ---     |      |
| ----   | 1 | 2 | 8 | 41.644 | ---    | 2.1670 | ---    | ---     |      |
| ----   | 3 | 2 | 5 | 41.653 | ---    | 2.1665 | ---    | ---     |      |
| ----   | 3 | 4 | 3 | 42.173 | ---    | 2.1410 | ---    | ---     |      |
| ----   | 2 | 6 | 2 | 42.248 | ---    | 2.1374 | ---    | ---     |      |
| ----   | 1 | 4 | 7 | 42.451 | ---    | 2.1276 | ---    | ---     |      |
| ----   | 1 | 5 | 6 | 42.550 | ---    | 2.1229 | ---    | ---     |      |
| 42.632 | 4 | 0 | 0 | 42.583 | -0.049 | 2.1213 | 2.1190 | 0.0023  | 10.6 |
| ----   | 1 | 7 | 1 | 42.717 | ---    | 2.1150 | ---    | ---     |      |
| ----   | 4 | 0 | 1 | 42.868 | ---    | 2.1079 | ---    | ---     |      |
| ----   | 2 | 4 | 6 | 42.918 | ---    | 2.1055 | ---    | ---     |      |
| ----   | 4 | 1 | 0 | 43.006 | ---    | 2.1015 | ---    | ---     |      |
| ----   | 3 | 0 | 6 | 43.109 | ---    | 2.0967 | ---    | ---     |      |
| 43.261 | 4 | 1 | 1 | 43.289 | 0.027  | 2.0884 | 2.0896 | -0.0012 | 7.5  |
| ----   | 3 | 1 | 6 | 43.527 | ---    | 2.0775 | ---    | ---     |      |

Electronic Supplementary Information for Dalton Transactions  
 This journal is © The Royal Society of Chemistry 2008

|        |   |   |    |        |        |        |        |              |
|--------|---|---|----|--------|--------|--------|--------|--------------|
| ----   | 1 | 7 | 2  | 43.566 | ---    | 2.0757 | ---    | ---          |
| ----   | 2 | 5 | 5  | 43.581 | ---    | 2.0750 | ---    | ---          |
| ----   | 0 | 7 | 3  | 43.600 | ---    | 2.0742 | ---    | ---          |
| ----   | 2 | 3 | 7  | 43.658 | ---    | 2.0716 | ---    | ---          |
| ----   | 2 | 6 | 3  | 43.668 | ---    | 2.0711 | ---    | ---          |
| ----   | 3 | 5 | 1  | 43.692 | ---    | 2.0700 | ---    | ---          |
| ----   | 4 | 0 | 2  | 43.715 | ---    | 2.0690 | ---    | ---          |
| ----   | 1 | 3 | 8  | 43.759 | ---    | 2.0670 | ---    | ---          |
| ----   | 3 | 3 | 5  | 43.769 | ---    | 2.0666 | ---    | ---          |
| ----   | 0 | 1 | 9  | 43.832 | ---    | 2.0637 | ---    | ---          |
| ----   | 1 | 6 | 5  | 44.048 | ---    | 2.0541 | ---    | ---          |
| ----   | 2 | 0 | 8  | 44.120 | ---    | 2.0509 | ---    | ---          |
| ----   | 4 | 1 | 2  | 44.129 | ---    | 2.0505 | ---    | ---          |
| ----   | 3 | 4 | 4  | 44.153 | ---    | 2.0495 | ---    | ---          |
| ----   | 4 | 2 | 0  | 44.253 | ---    | 2.0451 | ---    | ---          |
| ----   | 3 | 5 | 2  | 44.526 | ---    | 2.0332 | ---    | ---          |
| ----   | 4 | 2 | 1  | 44.530 | ---    | 2.0330 | ---    | ---          |
| ----   | 2 | 1 | 8  | 44.531 | ---    | 2.0330 | ---    | ---          |
| 44.756 | 3 | 2 | 6  | 44.763 | 0.007  | 2.0229 | 2.0232 | -0.0003 12.5 |
| ----   | 1 | 0 | 9  | 44.773 | ---    | 2.0225 | ---    | ---          |
| ----   | 0 | 5 | 7  | 44.825 | ---    | 2.0203 | ---    | ---          |
| ----   | 1 | 7 | 3  | 44.953 | ---    | 2.0148 | ---    | ---          |
| ----   | 4 | 0 | 3  | 45.098 | ---    | 2.0087 | ---    | ---          |
| ----   | 1 | 1 | 9  | 45.179 | ---    | 2.0053 | ---    | ---          |
| ----   | 0 | 4 | 8  | 45.278 | ---    | 2.0011 | ---    | ---          |
| ----   | 4 | 2 | 2  | 45.352 | ---    | 1.9980 | ---    | ---          |
| ----   | 4 | 1 | 3  | 45.502 | ---    | 1.9918 | ---    | ---          |
| ----   | 2 | 6 | 4  | 45.596 | ---    | 1.9879 | ---    | ---          |
| ----   | 0 | 6 | 6  | 45.727 | ---    | 1.9825 | ---    | ---          |
| 53.921 | 0 | 1 | 11 | 54.108 | 0.187  | 1.6936 | 1.6990 | -0.0054 3.8  |
| ----   | 0 | 4 | 10 | 54.404 | ---    | 1.6850 | ---    | ---          |
| ----   | 1 | 0 | 11 | 54.915 | ---    | 1.6705 | ---    | ---          |
| ----   | 1 | 1 | 11 | 55.265 | ---    | 1.6608 | ---    | ---          |
| ----   | 1 | 4 | 10 | 55.557 | ---    | 1.6528 | ---    | ---          |
| 56.353 | 1 | 2 | 11 | 56.307 | -0.046 | 1.6325 | 1.6313 | 0.0012 4.0   |
| ----   | 0 | 3 | 11 | 56.894 | ---    | 1.6171 | ---    | ---          |
| ----   | 1 | 3 | 11 | 58.014 | ---    | 1.5885 | ---    | ---          |
| ----   | 2 | 0 | 11 | 58.309 | ---    | 1.5811 | ---    | ---          |
| ----   | 1 | 5 | 10 | 58.634 | ---    | 1.5732 | ---    | ---          |
| ----   | 2 | 1 | 11 | 58.646 | ---    | 1.5729 | ---    | ---          |
| ----   | 2 | 4 | 10 | 58.927 | ---    | 1.5660 | ---    | ---          |
| ----   | 0 | 0 | 12 | 59.098 | ---    | 1.5619 | ---    | ---          |
| ----   | 2 | 2 | 11 | 59.648 | ---    | 1.5488 | ---    | ---          |

**Supporting information 3, XRPD patterns of dehydration and rehydration for complex 1 at different cycles.**

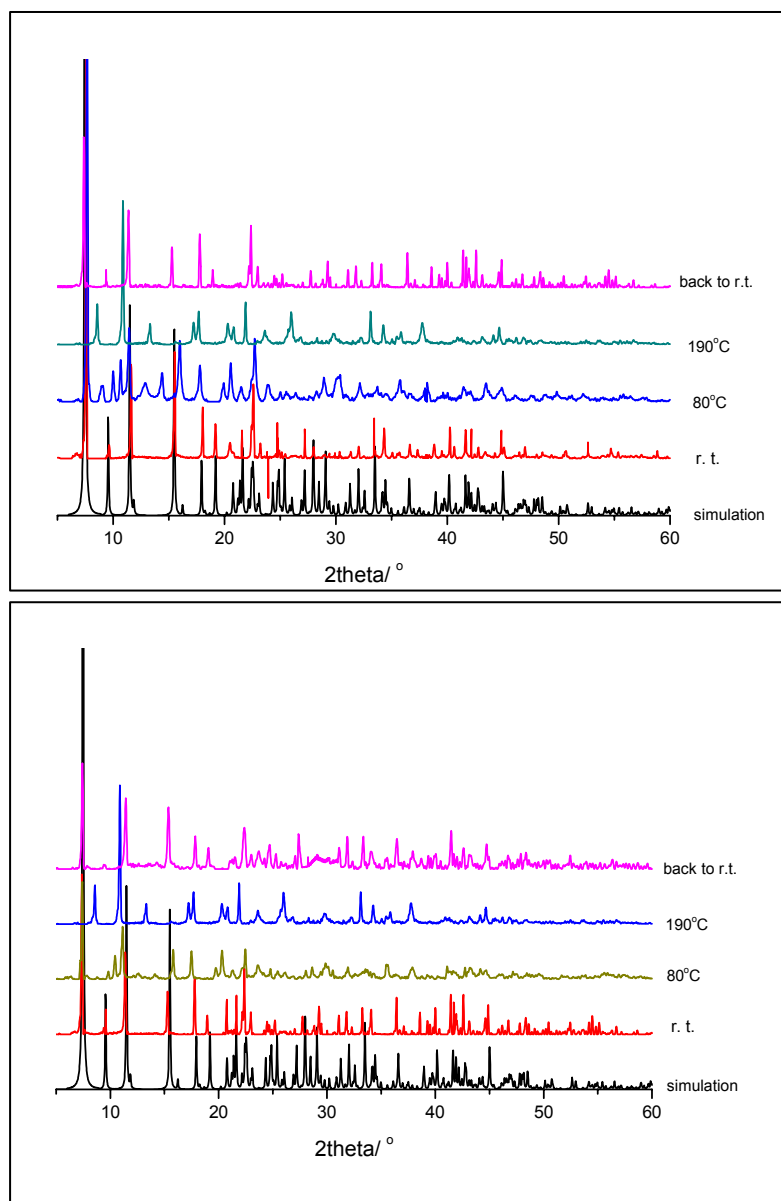

**Fig.** The first (up) and second (down) cycle of XRPD patterns of dehydration and rehydration for complex 1.

#### Supporting information 4, Synthesis and X-ray crystallography of complex 1

**Synthesis:** Complex **1** was prepared as follows: An aqueous reaction mixture was prepared by dissolving H<sub>3</sub>L (0.044 g, 0.25 mmol), NaHCO<sub>3</sub> (0.022 g, 0.25 mmol), and La(NO<sub>3</sub>)<sub>3</sub> (0.108g, 0.25 mmol) in 18 mL of de-ionized water. Its pH was adjusted to 6.4 with 1.0 M NaOH. The resulting mixture was transferred to a 25-mL Teflon-lined vessel (Parr) and heated at 150°C for 1000 min. Cooling of the reaction mixture to room temperature at a rate of 5°C per hour afforded colourless crystalline solids as the product (yield: 0.027g; 27% based on La). Anal. Calcd (%) for C<sub>11</sub>H<sub>22</sub>La<sub>2</sub>N<sub>4</sub>O<sub>20</sub>: C, 16.42; H, 2.24; N, 6.96. Found: C, 16.37; H, 2.37; N, 6.93.

**X-ray Crystallography:** Data collection was performed on a Bruker SMART Apex CCD diffractometer at 223 K for complex **1**. Absorption corrections were applied by using the multiscan program SADABS.<sup>1</sup> The structures were solved by direct methods, and non-hydrogen atoms, except for O4w and O5w, were refined anisotropically by least-squares on  $F^2$  using the SHELXTL program.<sup>2</sup> The O4w and O5w refined isotropically is due to their disorder, and no improvement can be achieved in the anisotropic thermal parameters by modelling disorder and/or using appropriate restraints, although the occupancies of these atoms are correct. The hydrogen atoms of organic ligands were generated geometrically (C-H, 0.96 Å, N-H = 0.87), while those for O1w to O5w are generated by using restraints on the O-H bond lengths and H-O-H bond angles and the fixing of the hydrogen atom U value to be 1.5 U(eq) of the parent oxygen atom. Generating the hydrogen atoms for O6w/O6w' is failure, due to its anisotropic thermal parameters large enough even after modelling the disorder of the atom.

Crystal data are: C<sub>11</sub>H<sub>22</sub>La<sub>2</sub>N<sub>4</sub>O<sub>20</sub>, orthorhombic, space group *Pnma*,  $a = 8.521(2)$ ,  $b = 18.477(4)$ ,  $c = 15.380(4)$  Å,  $V = 2421.4(10)$  Å<sup>3</sup>,  $Z = 4$ ,  $\rho_{\text{calcd}} = 2.217\text{g}\cdot\text{cm}^{-3}$ ,  $M = 808.15$ ,  $\mu(\text{Mo } K\alpha) = 3.579\text{ mm}^{-1}$ ,  $T = 223\text{ K}$ .  $R_{\text{int}} = 0.0513$ ,  $R_1 = 0.0595$  ( $I > 2\sigma(I)$ ),  $wR_2 = 0.1204$  (all data) are obtained based on the 12529 reflections measured (of which, 2460 are independent and 2254 are observed) and 173

parameters.
